## Equipment-free detection of SARS-CoV-2 and Variants of Concern using Cas13

Jon Arizti-Sanz<sup>1,2</sup>, A'Doriann Bradley<sup>1</sup>, Yibin B. Zhang<sup>1,3</sup>, Chloe K. Boehm<sup>1,4</sup>, Catherine A. Freije<sup>1</sup>, Michelle E. Grunberg<sup>1,4</sup>, Tinna-Solveig F. Kosoko-Thoroddsen<sup>1</sup>, Nicole L. Welch<sup>1,5</sup>, Priya P. Pillai<sup>1</sup>, Sreekar Mantena<sup>1</sup>, Gaeun Kim<sup>1,4</sup>, Jessica N. Uwanibe<sup>6,7</sup>, Oluwagboadurami G. John<sup>7</sup>, Philomena E. Eromon<sup>6</sup>, Gregory Kocher<sup>8</sup>, Robin Gross<sup>8</sup>, Justin S. Lee<sup>9</sup>, Lisa E. Hensley<sup>8</sup>, Christian T. Happi<sup>6,7,10</sup>, Jeremy Johnson<sup>1</sup>, Pardis C. Sabeti<sup>1,3,10,11,12</sup> & Cameron Myhrvold<sup>4,12,\*</sup>.

<sup>1</sup> Broad Institute of Massachusetts Institute of Technology (MIT) and Harvard, Cambridge, MA 02142, USA. <sup>2</sup> Harvard-MIT Program in Health Sciences and Technology, 77 Massachusetts Avenue, Cambridge, MA 02139, USA. <sup>3</sup> Department of Organismic and Evolutionary Biology, Harvard University, 26 Oxford Street, Cambridge, MA 02138, USA. <sup>4</sup> Department of Molecular Biology, Princeton University, Princeton, NJ 08544, USA. <sup>5</sup> Program in Virology, Harvard Medical School, Boston, MA 02115, USA. <sup>6</sup> African Centre of Excellence for Genomics of Infectious Diseases (ACEGID), Redeemer's University, Ede, Osun State, Nigeria. <sup>7</sup> Department of Biological Sciences, College of Natural Sciences, Redeemer's University, Ede, Osun State, Nigeria. <sup>8</sup> Integrated Research Facility, Division of Clinical Research, National Institute of Allergy and infectious diseases, National Institute of Health, Frederick, MD 21702, USA. <sup>9</sup> Biotechnology Cores Facility Branch, Division of Scientific Resources, National Center for Emerging and Infectious Diseases, Centers for Disease Control and Prevention, Atlanta, Georgia, USA. <sup>10</sup> Harvard T.H. Chan School of Public Health, 677 Huntington Avenue, Boston, MA 02115, USA. <sup>11</sup> Howard Hughes Medical Institute, Chevy Chase, MD 20815, USA. <sup>12</sup> These authors jointly supervised this work: Pardis C. Sabeti, Cameron Myhrvold. \*Corresponding author. email: [cmyhrvol@princeton.edu](mailto:cmyhrvol@princeton.edu)

### Abstract

The COVID-19 pandemic, and the recent rise and widespread transmission of SARS-CoV-2 Variants of Concern (VOCs), have demonstrated the need for ubiquitous nucleic acid testing outside of centralized clinical laboratories. Here, we develop SHINEv2, a Cas13-based nucleic acid diagnostic that combines quick and ambient temperature sample processing and lyophilized reagents to greatly simplify the test procedure and assay distribution. We benchmarked a SHINEv2 assay for SARS-CoV-2 detection against state-of-the-art antigen-capture tests using 96 patient samples, demonstrating 50-fold greater sensitivity and 100% specificity. We designed SHINEv2 assays for discriminating the Alpha, Beta, Gamma and Delta VOCs, which can be read out visually using lateral flow technology. We further demonstrate that our assays can be performed without any equipment in less than 90 minutes. SHINEv2 represents an important advance towards rapid nucleic acid tests that can be performed in any location.

## 1 Introduction

2  
3 Frequent and widespread testing is critical to prevent and respond to infectious disease  
4 outbreaks. For example, large-scale testing to track the prevalence and transmission of severe  
5 acute respiratory syndrome coronavirus 2 (SARS-CoV-2) has been essential to manage the  
6 ongoing coronavirus disease 2019 (COVID-19) pandemic<sup>1-3</sup>. Ubiquitous and frequent diagnostic  
7 testing leads to the rapid identification of new cases and permits the swift treatment or isolation  
8 of infected individuals, thereby preventing further viral spread<sup>4</sup>. However, the gold standard for  
9 COVID-19 diagnosis, reverse transcription quantitative polymerase chain reaction (RT-qPCR),  
10 remains suboptimal for orchestrating this response. RT-qPCR requires specialized equipment  
11 and expertise rarely found outside of centralized laboratories. In addition, an insufficient testing  
12 infrastructure coupled with reagent shortages and high testing demand have led to slow sample-  
13 to-answer times (often of several days) for RT-qPCR<sup>5,6</sup>. Alternative diagnostic technologies that  
14 enable rapid and decentralized testing are vital to respond to the current and future pandemics.

15  
16 Lateral flow antigen-capture tests and isothermal nucleic acid diagnostics with visual readouts  
17 represent promising alternatives for SARS-CoV-2 testing outside of centralized laboratories. The  
18 effectiveness of such tests in curbing the spread of SARS-CoV-2 has been demonstrated in  
19 multiple settings, ranging from nursing homes to whole countries<sup>3,7</sup>. Antigen-capture tests, such  
20 as Abbott's BinaxNow COVID - 19 Antigen Self Tests, are quick and user-friendly but their  
21 moderate sensitivity means they can miss potentially infectious individuals<sup>8-10</sup>. Isothermal nucleic  
22 acid amplification methods, such as loop-mediated isothermal amplification (LAMP), are more  
23 sensitive than antigen-capture tests and operate at a single temperature<sup>11,12</sup>. The deployment of  
24 LAMP-based tests has been facilitated by the use of auxiliary devices to eliminate the need for  
25 intensive nucleic acid purification and maintain a stable temperature during amplification<sup>13</sup>.  
26 However, these devices are often too costly for single-use and difficult to manufacture at the scale  
27 required for population-wide distribution, which can limit their utility for frequent and widespread  
28 testing<sup>14</sup>. Hence, the continued development and deployment of user-friendly, sensitive and  
29 equipment-free diagnostics is key to enhance the public health response to COVID-19.

30  
31 CRISPR-based diagnostics (CRISPR-Dx) are promising technologies for SARS-CoV-2 testing  
32 with minimal equipment requirements. CRISPR-Dx usually combine isothermal nucleic acid  
33 amplification methods (often LAMP or recombinase polymerase amplification (RPA)) with a RNA-  
34 guided CRISPR-Cas nuclease (usually Cas12 or Cas13) for pathogen detection<sup>15-18</sup>. Detection of  
35 an amplified target nucleic acid triggers cleavage of a reporter molecule by the CRISPR-Cas  
36 enzyme. This reporter cleavage can be detected by the appearance of visual bands on a lateral  
37 flow strip, among other methods<sup>18,19</sup>. Pairing isothermal nucleic acid amplification methods with  
38 Cas nuclease detection considerably enhances specificity and sensitivity, but at the expense of  
39 increasing assay complexity. Some groups have simplified the workflow by eliminating the need  
40 for amplification using more active Cas enzymes, although they rely on custom-built equipment  
41 and nucleic acid extraction<sup>20,21</sup>. Several groups have combined multiple enzymatic steps into  
42 individual reactions to streamline CRISPR-Dx<sup>22,23</sup>. We previously developed SHINE (Sstreamlined  
43 Highlighting of Infections to Navigate Epidemics), henceforth SHINEv1, a diagnostic assay that  
44 does not require nucleic acid extractions or custom equipment<sup>23</sup>. However, SHINEv1 involves

45 multiple heating steps, and uses reagent mixes that require cold temperature storage and manual  
46 preparation by trained personnel. Further simplifications and technical improvements to CRISPR-  
47 Dx would greatly facilitate test distribution and expand their use cases.

48  
49 Frequent and widespread testing is even more important with the rise of highly transmissible  
50 SARS-CoV-2 variants. In recent months, the evolution of SARS-CoV-2 has led to the emergence  
51 and sustained transmission of viral variants with sets of mutations that can increase infectivity or  
52 reduce neutralization by antibodies, making the virus harder to contain<sup>24</sup>. The World Health  
53 Organization (WHO) has designated some of the SARS-CoV-2 variants with increased  
54 transmissibility, virulence and/or antigenicity as Variants of Concern (VOCs). Notably, the Alpha,  
55 Beta, Gamma and Delta VOCs (designated B.1.1.7, B.1.351, P.1 and B.1.617.2 with the PANGO  
56 nomenclature system, respectively) are widely circulating in many countries around the world and  
57 have placed unprecedented strain on several healthcare systems<sup>25,26</sup>. Surveillance of SARS-CoV-  
58 2 VOCs is vital to inform public health and clinical decisions, such as for prioritizing testing or  
59 vaccination in the populations most heavily impacted by the pandemic. Currently, the identification  
60 of viral mutations and tracking of circulating SARS-CoV-2 variants is performed by viral genomic  
61 sequencing and a small number of mutation-specific RT-qPCR tests<sup>27-29</sup>. However, the lack of  
62 infrastructure and expertise have made routine genomic surveillance difficult to perform outside  
63 of specialized genomic centers<sup>30</sup>.

64  
65 CRISPR-Dx are uniquely suited to detect VOCs for routine surveillance applications. In contrast  
66 to available point-of-need tests, CRISPR-Dx can easily detect individual SARS-CoV-2 mutations.  
67 They do so by measuring relative signal intensities using a set of two crRNAs designed against  
68 the variant region<sup>15,19,31</sup>. To date, only a few CRISPR-Dx have been developed for the  
69 identification of single or multiple nucleotide substitutions present in various SARS-CoV-2  
70 VOCs<sup>32-35</sup>. However, these tests consist of multiple liquid handling steps or rely on custom-built  
71 equipment<sup>32,35</sup>. The development of equipment-free and user-friendly CRISPR-Dx assays to  
72 distinguish SARS-CoV-2 VOCs would fill a major unmet need in COVID-19 diagnostics.

73  
74 Here, we develop SHINEv2, a fast, user-friendly and widely deployable technology for the  
75 detection of SARS-CoV-2 and its variants in clinical samples. We improve upon SHINEv1 by  
76 incorporating a fast and ambient-temperature sample lysis procedure and enabling the  
77 lyophilization of the assay reagents. These improvements considerably reduce assay complexity  
78 and facilitate its distribution. We demonstrate that SHINEv2 can detect SARS-CoV-2 RNA in  
79 unextracted patient samples with 100% specificity and 50-fold higher sensitivity than cutting-edge  
80 antigen-capture tests. Moreover, we designed and validated SHINEv2 assays to discriminate the  
81 Alpha, Beta, Gamma and Delta VOCs in clinical samples. Finally, we introduced a Cas12-based  
82 human RNase P control, further simplified the lateral flow assay and examined the performance  
83 of SHINEv2 at ambient-temperature. These additional advances could expand the use cases of  
84 SHINEv2 to virtually any location, including at-home settings.

85

## 86 Results

87

### 88 *Design of SHINE assay for SARS-CoV-2 detection - S gene assay*

89 We previously developed a SHINEv1 assay to detect SARS-CoV-2 open reading frame 1a  
90 (ORF1a) directly from clinical samples<sup>23</sup>. We wondered if the performance of SHINE could be  
91 further enhanced through the selection of target sites with more active RPA primers and crRNAs.  
92 Using ADAPT<sup>36</sup>, a genomics-informed computational design tool for nucleic acid based  
93 diagnostics, on 308,315 SARS-CoV-2 genomes collected before February 2021, we identified  
94 RPA primers and 3 crRNAs with high predicted activity in detecting the S gene of SARS-CoV-2.  
95 We selected the most active crRNA by measuring Cas13 cleavage activity on synthetic RNA  
96 targets without prior amplification (Supplementary Fig. 1) and we optimized the RPA primer  
97 concentration to create the S gene assay. We performed bioinformatic analysis to ensure that the  
98 crRNA and RPA primer sequences were highly conserved across SARS-CoV-2 genomes. The  
99 crRNA sequence was fully conserved in 99.79% of the 308,315 SARS-CoV-2 genomes analysed  
100 and the RPA primers were predicted to amplify 99.77% of the genomes. When compared to the  
101 ORF1a assay, the S gene assay was found to be 1-2x faster and 10x more sensitive  
102 (Supplementary Fig. 2). Therefore, given its increased sensitivity and favorable kinetics, we  
103 selected the S gene assay for further development.

104

### 105 *Improving the accessibility of SHINEv1*

106 For SARS-CoV-2 diagnostic testing to occur in virtually any location, improvements were needed  
107 to increase user-friendliness and facilitate test distribution. Towards this goal, we developed  
108 SHINEv2, which incorporates ambient-temperature sample processing and lyophilized testing  
109 reagents, thereby greatly simplifying reagent transport and storage and decreasing the overall  
110 complexity of the assay.

111

112 To be an effective approach, extraction-free sample processing must inactivate nucleases and  
113 infectious viral particles, and must be compatible with the assay, allowing for good diagnostic  
114 performance. Previously, we circumvented the need for clinical sample extraction using  
115 HUDSON, a nuclease inactivation and viral lysis method that relies on heat and chemical  
116 reduction<sup>19,23</sup>. To eliminate HUDSON's need for heating elements and incubation at two  
117 temperatures, we sought to find an ambient temperature alternative for sample processing.  
118 FastAmp Viral and Cell Solution for COVID-19 testing (Intact Genomics) functions at ambient  
119 temperature and has been reported to be compatible with isothermal nucleic acid amplification  
120 methods<sup>37</sup>. Therefore, we investigated whether this lysis reagent was also compatible with Cas13-  
121 based detection methods.

122

123 We assessed the ability of the FastAmp lysis reagent to inactivate RNases in contrived nasal  
124 samples. Our contrived samples consisted of 10% (v/v) healthy nasal fluid in universal transport  
125 medium (UTM). After treatment, we added RNaseAlert, a reporter that fluoresces in the presence  
126 of RNase activity (Fig. 1a). Without treatment, contrived nasal samples contained high levels of  
127 RNases, as indicated by the high fluorescence.



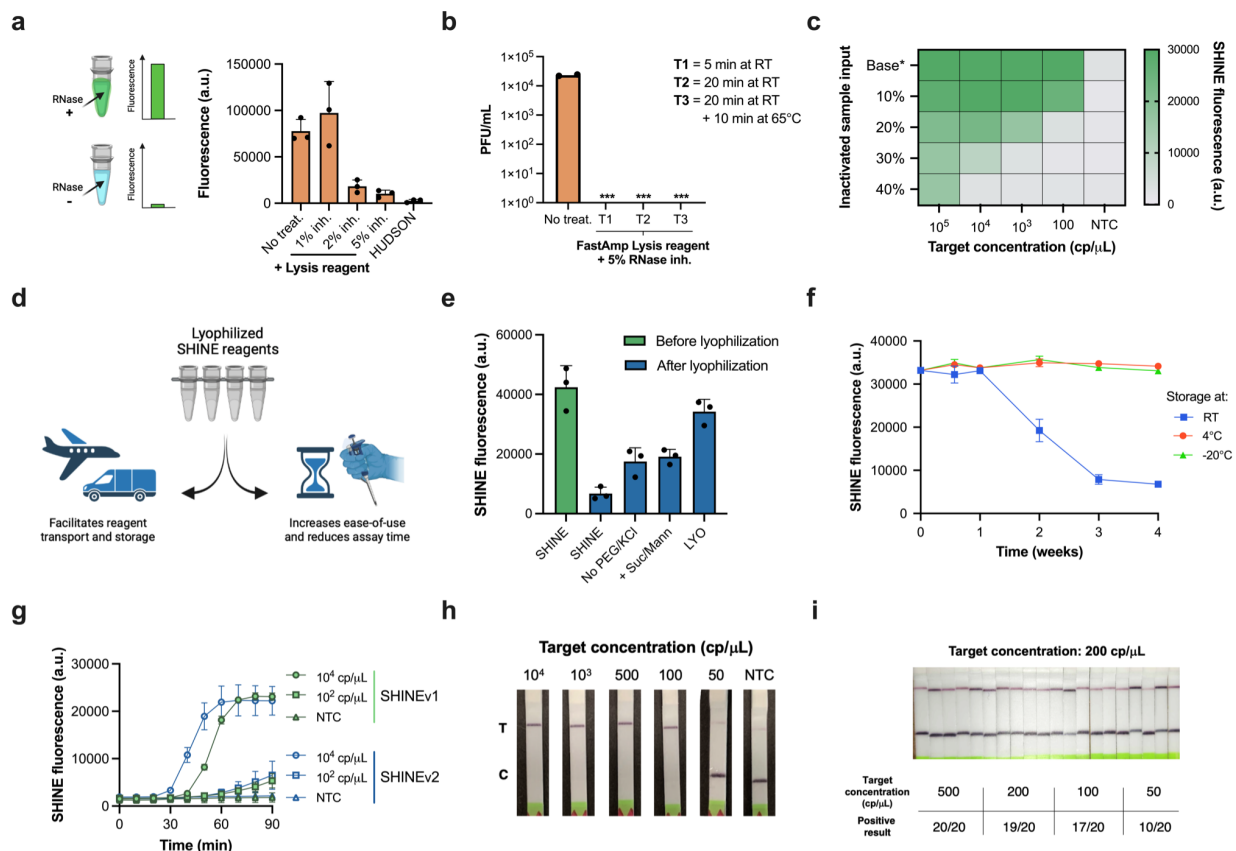

128  
 129 **Fig. 1 | Increasing the ease-of-use and deployability of SHINE.** **a**, RNase activity in nasal fluid  
 130 mixed with universal viral transport medium (UTM) untreated or treated with FastAmp Lysis reagent  
 131 supplemented with RNase inhibitor (inh.) or treated with HUDSON (a heat- and chemical- treatment).  
 132 Activity measured using RNaseAlert at room temperature (RT) for 30 minutes. **b**, SARS-CoV-2  
 133 seedstock titer without treatment or after being incubated with lysis reagent (+5% RNase inh.) at RT  
 134 for 5 minutes, 20 minutes or 20 minutes plus 10 minutes at 65°C. \*\*\*, infection not detected; PFU,  
 135 plaque forming units. **c**, SHINE fluorescence with different proportions of inactivated sample input (i.e.  
 136 FastAmp lysis reagent, RNase inh. and UTM) after a 90 minute incubation. Base\*, baseline (i.e. no  
 137 inactivated sample added). **d**, Schematic of the advantages of lyophilizing SHINE. **e**, SHINE  
 138 fluorescence on synthetic RNA target ( $10^4$  copies/ $\mu\text{L}$ ) before and after lyophilization using different  
 139 buffers. Fluorescence measured after 90 minutes. For buffer composition, see *Methods*. **f**, SHINE  
 140 fluorescence after a 90 minute incubation using lyophilized (LYO) reagents stored at RT, 4°C or -20°C  
 141 over time. Target concentration:  $10^4$  copies/ $\mu\text{L}$ . **g**, Fluorescence kinetics for SHINEv1 and SHINEv2  
 142 using synthetic RNA targets; NTC, no target control. **h**, Lateral flow detection of SARS-CoV-2 RNA in  
 143 lysis buffer treated viral seedstocks using SHINEv2, after a 90 minute incubation. C = control band; T  
 144 = test band. **i**, Determination of analytical limit of detection with 20 replicates of SHINEv2 at different  
 145 concentrations of SARS-CoV-2 RNA from lysis reagent treated contrived samples. Incubated for 90  
 146 minutes. For **(a,e,g)**, center = mean and error bars = standard deviation (s.d.) for 3 technical replicates.  
 147 In **c**, the heatmap values represent the mean for 3 technical replicates. For **f**, center = mean and error  
 148 bars = s.d. for 3 biological replicates with 3 technical replicates each.  
 149

150 Treatment with FastAmp lysis reagent supplemented with 5% RNase inhibitors decreased the  
151 RNase activity by over 85% in contrived nasal samples (Fig. 1a). In addition, the ratio of nasal  
152 fluid to UTM in clinical samples derived from nasal swabs is likely to be significantly lower than  
153 10% and therefore, the residual RNase activity in lysed patient samples is expected to be even  
154 lower.

155  
156 Having determined the nuclease inactivation capacity of this lysis solution, we tested its ability to  
157 inactivate SARS-CoV-2 viral seedstocks. For each treatment, we quantified the amount of viable  
158 virus after two passages using a plaque-based assay (Fig. 1b). Incubation of SARS-CoV-2 with  
159 the lysis solution for as little as 5 minutes at room temperature (RT) yielded no discernible  
160 plaques, thereby confirming the ability of our lysis solution to swiftly inactivate the virus.

161  
162 We then examined the compatibility of this lysis solution with good SHINE assay performance.  
163 Solution-based sample processing methods often introduce an upper bound of inactivated sample  
164 input that can be added, which is dictated by the balance between increased sample volume and  
165 decreased assay performance caused by the lysis reagents. Therefore, we supplemented these  
166 SHINE reactions with different proportions of inactivated sample inputs (i.e. contrived nasal  
167 samples treated with lysis solution) (Fig. 1c). An input of 10% (v/v) inactivated sample into SHINE  
168 was able to retain full activity while still doubling the amount of sample added with respect to the  
169 previous instantiation of SHINE, which used 5% (v/v) inactivated sample<sup>23</sup> (Supplementary Fig.  
170 3). Larger input volumes, which would increase the volume of clinical sample added, led to a  
171 marked decrease in the sensitivity of SHINE. (Fig. 1C and Supplementary Fig. 3). Thus, our lysis  
172 procedure - FastAmp lysis reagent with 5% RNase inhibitor for 5 min - is compatible with SHINE  
173 and can effectively inactivate nucleases and SARS-CoV-2 virions, making it ideal for rapid and  
174 equipment-free sample processing at ambient temperature.

175  
176 Lyophilization can facilitate the transport and storage of point-of-care CRISPR-Dx by eliminating  
177 the need for a cold chain and increasing the shelf life (Fig. 1d). Lyophilization also simplifies  
178 reaction setup, by allowing the full reaction to be easily reconstituted by the end user. Initially,  
179 lyophilization with the original SHINE buffer led to a profound drop in activity post-lyophilization  
180 (Fig. 1e). We sought to improve the lyophilization process through the addition of non-reducing  
181 disaccharides (e.g. sucrose), which can act as stabilizers; the addition of bulking agents (e.g.  
182 mannitol) and the removal of potentially destabilizing components, such as polyethylene glycol  
183 (PEG) and potassium chloride (KCl). Specifically, the removal of 3.5% PEG-8000 and 60 mM KCl  
184 from the original SHINE buffer or the addition of 5% (w/v) sucrose and 150 mM mannitol each  
185 moderately increased SHINE's activity post-lyophilization. With these modifications combined (i.e.  
186 LYO buffer), SHINE retained its full activity after lyophilization (Fig. 1e and Supplementary Fig.  
187 4).

188  
189 Having optimized the lyophilization excipients and procedure, we conducted a month-long  
190 experiment to determine the stability of the lyophilized SHINE reagents at different temperatures  
191 over time. After being stored at RT, 4°C or -20°C for 4, 7, 14, 21 or 28 days, SHINE pellets were  
192 rehydrated and tested on full genome synthetic RNA standards (Twist Bioscience). SHINE pellets  
193 retained full activity for >1 week at RT and at least a month at 4°C/-20°C (Fig. 1f). By enabling

194 transport and storage at above-freezing temperatures, lyophilized SHINE greatly simplifies  
195 distribution logistics.

196  
197 Our SHINEv2 technology, which incorporates a new sample lysis procedure and lyophilization  
198 into SHINEv1, can sensitively detect nucleic acids with a simple workflow. SHINEv2 substantially  
199 reduced the hands-on time and liquid-handling steps needed from the user, from over 45 minutes  
200 and 20 pipetting steps in SHINEv1 to less than 10 minutes and 5 user-operations in SHINEv2  
201 (Supplementary Fig. 5). When tested side-by-side with SHINEv1, we found the sensitivity and  
202 reaction kinetics of the two methods to be equivalent at multiple target concentrations (Fig. 1g).  
203 SHINEv2 detected down to 100 copies per microliter (cp/ $\mu$ L) within 90 minutes, using either a  
204 plate-based fluorescence readout or a colorimetric lateral flow based readout (Fig. 1g and 1h).  
205 Moreover, we evaluated the impact of transportation and storage on SHINEv2 by comparing its  
206 performance over time in a second laboratory in Nigeria. Six weeks after production, and after  
207 transportation to a different continent, SHINEv2 was shown to detect down to 100 cp/ $\mu$ L of full  
208 genome synthetic RNA standards using a colorimetric lateral flow based readout (Supplementary  
209 Fig. 6).

210  
211 We sought to determine the analytical limit-of-detection (LoD) of SHINEv2 following the guidance  
212 released by the Food and Drug Administration (FDA)<sup>38</sup>. Under this guidance, the LoD is defined  
213 as the lowest concentration at which at least 19/20 technical replicates are detected. Using  
214 SHINEv2 in lateral flow format, we tested 20 replicates of a dilution series of heat-inactivated  
215 SARS-CoV-2 viral seedstock in UTM. We determined the analytical LoD of SHINEv2 to be 200  
216 cp/ $\mu$ L (Fig. 1i and Supplementary Fig. 7), which is over an order of magnitude lower than that of  
217 state-of-the-art antigen-capture tests and comparable to that of some equipment-based  
218 isothermal nucleic acid tests<sup>39,40</sup>. Given the optimal performance of SHINEv2 on contrived SARS-  
219 CoV-2 samples, we sought to determine its performance on clinical samples.

220  
221 *Assessing the clinical performance of SHINEv2 on NP swab samples.*

222 We assessed the clinical performance of SHINEv2 on 96 unextracted nasopharyngeal (NP) swab  
223 samples from SARS-CoV-2 positive and negative patients, compared to three widely used FDA  
224 EUA-authorized diagnostic tests. We first compared the performance of SHINEv2 to the CDC-  
225 recommended RT-qPCR protocol for SARS-CoV-2, as the gold-standard reference test<sup>41</sup>. We  
226 also compared SHINEv2 to two state-of-the-art antigen-capture tests: Abbott's BinaxNow COVID-  
227 19 antigen self-test (BinaxNow) and Access Bio's CareStart COVID-19 antigen test  
228 (CareStart)<sup>42,43</sup>. The BinaxNow test, the most widely used rapid test in the United States,  
229 represents the cutting-edge in antigen-capture tests. As a second point of comparison, we  
230 selected the CareStart test, which has the most similar workflow to SHINEv2 and has comparable  
231 performance to BinaxNow.

232  
233 We performed SHINEv2 testing side-by-side with the RT-qPCR, BinaxNow and CareStart tests  
234 (Fig. 2a,b). RT-qPCR detected SARS-CoV-2 RNA in 63 samples out of a total of 96

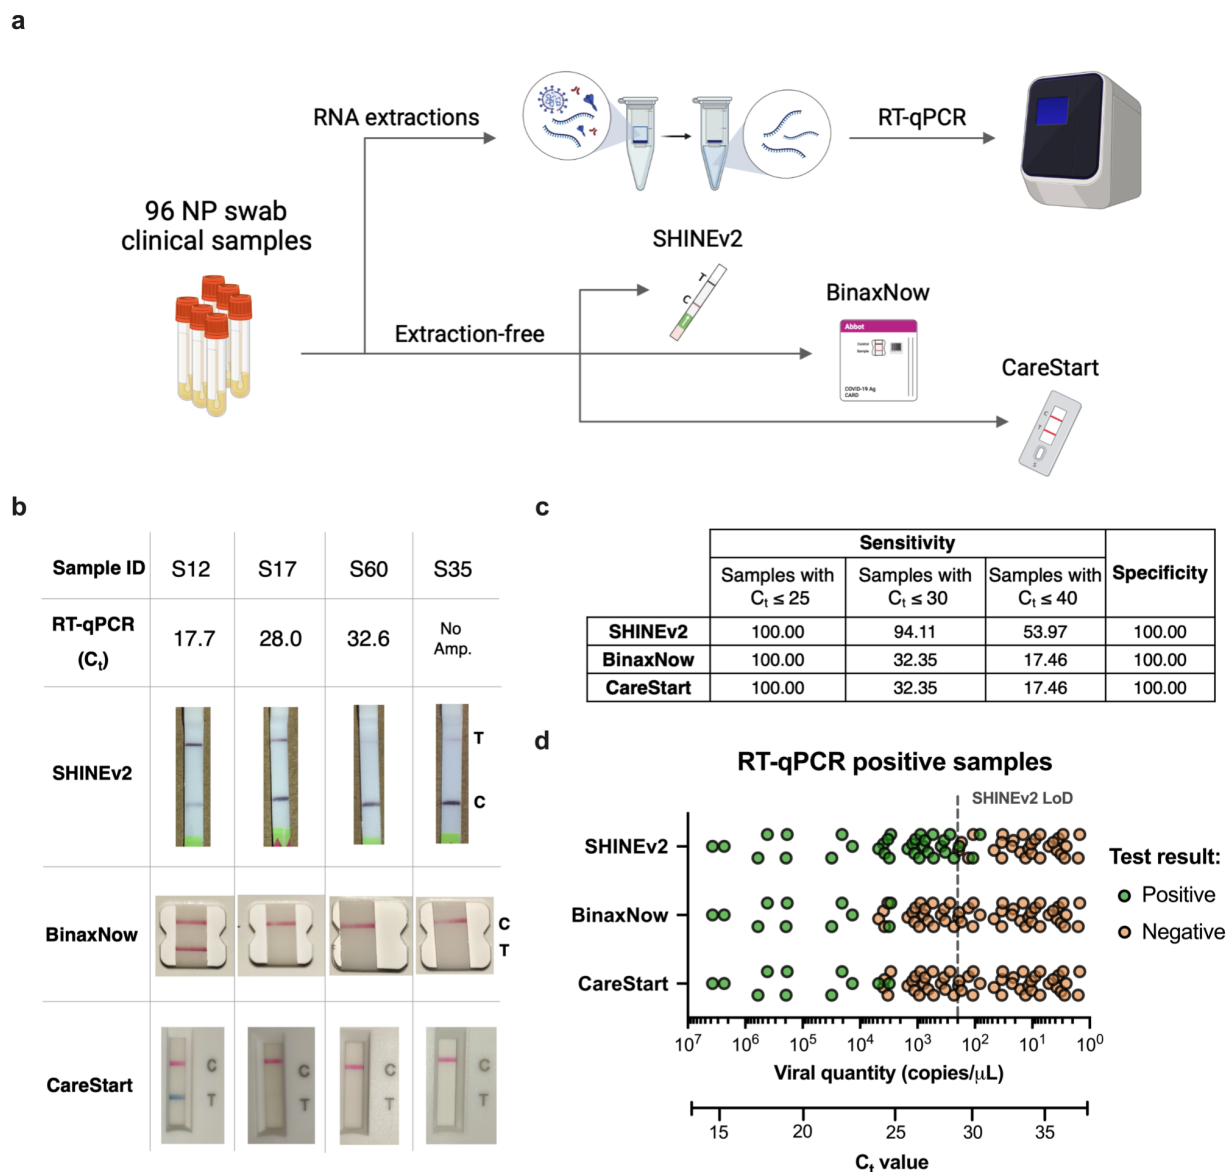

235  
 236 **Fig. 2 | Performance of SHINEv2 on clinical samples.** **a**, Schematic of side-by-side clinical  
 237 sample testing using SHINEv2, BinaxNow, CareStart and RT-qPCR. NP, nasopharyngeal swab.  
 238 **b**, SHINEv2, BinaxNow and CareStart test results for a subset of clinical NP swab samples with  
 239 different C<sub>t</sub> values (CDC EUA N1 RT-qPCR). C = control band; T = test band. No Amp., no  
 240 amplification detected. For all test results, see *Supplementary Fig. 8-10*. **c**, Side-by-side clinical  
 241 performance of SHINEv2, BinaxNow and CareStart versus RT-qPCR. **d**, Positive and negative  
 242 test results for SHINEv2, BinaxNow and CareStart tests for RT-qPCR-positive clinical samples  
 243 relative to viral RNA concentration and C<sub>t</sub> value.  
 244

245 samples tested, with cycle threshold ( $C_t$ ) values ranging from 14.7 to 37.2 (Supplementary Table  
246 1). SHINEv2 detected SARS-CoV-2 RNA in 9/9 RT-qPCR positive samples with  $C_t < 25$  (100%  
247 sensitivity), 32/34 samples with  $C_t < 30$  (94.1% sensitivity), and 34/63 samples with  $C_t < 40$  (54.0%  
248 sensitivity), (Fig. 2c and Supplementary Fig. 8-10). Notably, our assay correctly identified all  
249 positive samples with titers above our analytical LoD of 200 copies/ $\mu$ L and several samples below  
250 this LoD. This confirmed that the clinical performance of SHINEv2 is equivalent to its analytical  
251 performance.

252  
253 Moreover, SHINEv2 was 50 times more sensitive than either antigen-capture test<sup>42-45</sup> (Fig. 2d).  
254 SHINEv2 excelled at detecting samples with moderate viral loads (25-30  $C_t$ ), thereby allowing the  
255 identification of potentially infectious individuals that antigen-capture tests would miss<sup>8-10</sup>.  
256 Additionally, SHINEv2, BinaxNow and CareStart were shown to be highly specific, each having  
257 no false positive results in any of the 33 RT-qPCR-negative samples (100% specificity) (Fig. 2c).  
258 This is consistent with previously reported results for these antigen-capture tests<sup>42,43</sup> and is also  
259 expected for CRISPR-Dx, given that the RPA primers during amplification and the crRNA during  
260 Cas13-based detection provide two layers of specificity<sup>15</sup>. Importantly, the sensitivity and  
261 specificity of SHINEv2 on patient samples falls within the recommended range for population-  
262 wide screening in settings of reopening<sup>10,46</sup>.

263  
264 *Design and testing of SHINEv2 assays for SARS-CoV-2 VOC identification*

265 The emergence of SARS-CoV-2 variants with increased transmissibility and virulence, and the  
266 specificity and flexibility of SHINEv2, prompted us to develop assays to detect and distinguish  
267 four widely circulating VOCs. Initially, we focused on detecting the 69/70 deletion in the S gene,  
268 a hallmark of the Alpha VOC<sup>24,47</sup>. Then, we expanded to the K417N and K417T mutations found  
269 in the Beta and Gamma VOCs, respectively<sup>24,47</sup>. Finally, in light of the rampant spread of the Delta  
270 VOC in many countries around the world, we sought to rapidly develop new SHINEv2 assays to  
271 detect the L452R mutation and 156/157 deletion + R158G mutation present in this variant<sup>47,48</sup>.  
272 We designed sets of crRNAs with differential activities on the reference RNA genome (ancestral  
273 target) with respect to the RNA genome containing a given mutation (derived target), or vice versa  
274 (Fig. 3a).

275  
276 For the Alpha VOC, we manually designed a set of 10 ancestral and derived crRNAs to detect  
277 the 69/70 deletion. We selected an ancestral crRNA and a derived crRNA based on Cas13  
278 cleavage activity and their ability to discriminate between ancestral and derived RNA targets  
279 (Supplementary Fig. 11). The 69/70 deletion falls within the region amplified by the RPA primers  
280 from the S gene assay we previously developed (Supplementary Fig. 12). Using these primers,  
281 the 69/70 assay successfully detected the 69/70 deletion in synthetic RNA targets  
282 (Supplementary Fig. 13). For instance, on the ancestral RNA target, using the ancestral crRNA  
283 led to 7x greater fluorescence than the derived crRNA (Fig. 3b). Conversely, on derived RNA  
284 target, we observed 5x higher fluorescence with the derived crRNA than with the ancestral crRNA.  
285

286 Next, we sought to design additional assays for the identification of the Beta and Gamma VOCs.  
287 These variants contain distinct single nucleotide polymorphisms (SNPs) at amino acid



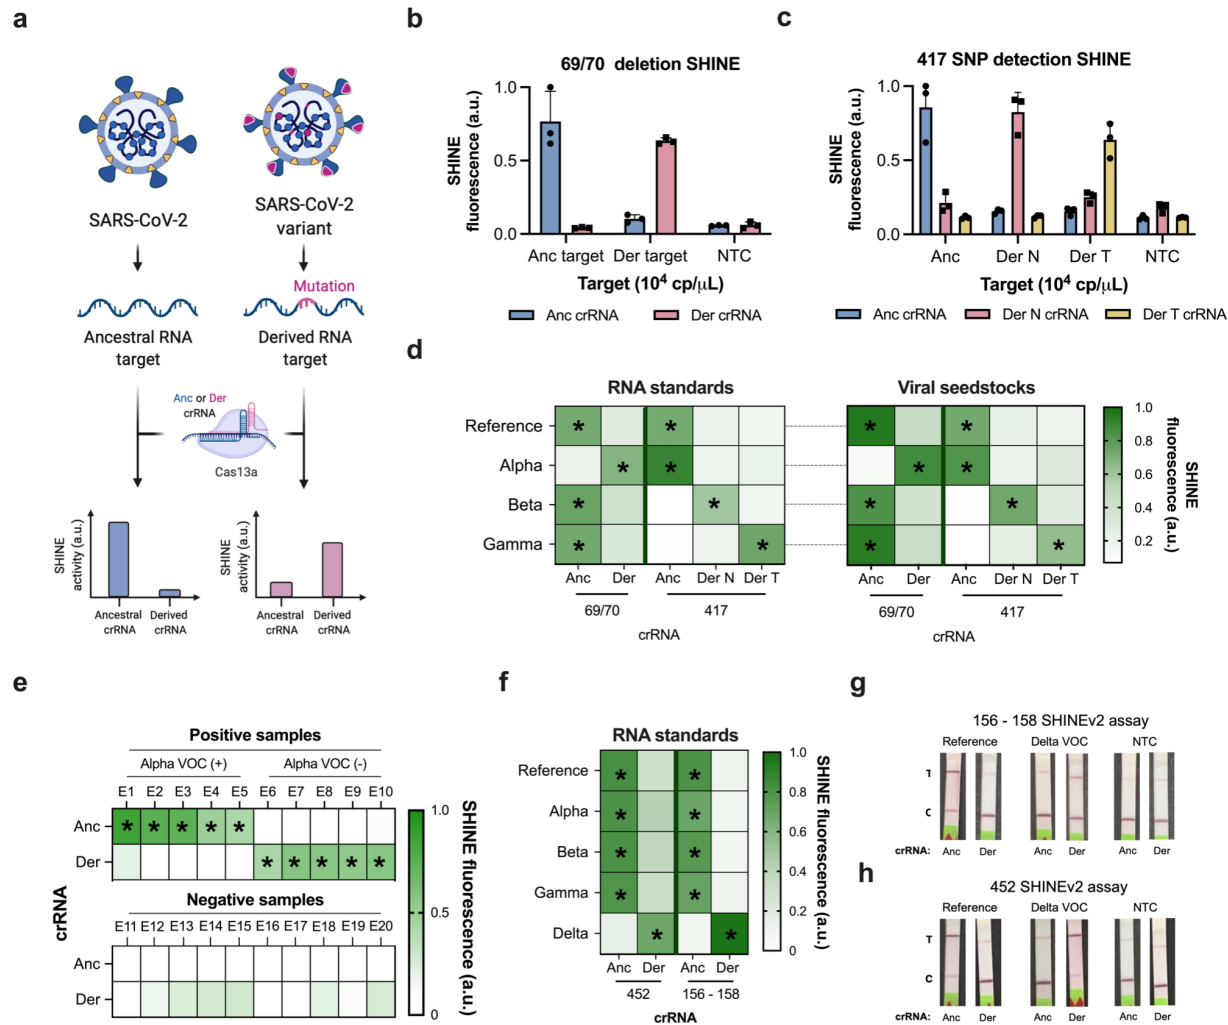

288  
 289 **Fig. 3 | Development of SHINEv2 assays for the detection of SARS-CoV-2 VOCs.** **a**,  
 290 Schematic of Cas13a-based detection of mutations in SARS-CoV-2 using a fluorescent readout;  
 291 anc, ancestral; der, derived. **(b,c)**, SHINE fluorescence of the ancestral and derived crRNAs for  
 292 the **(b)** 69/70 deletion assay and **(c)** on synthetic RNA targets after 90 minutes; NTC, no target  
 293 control. **d**, Identification of SARS-CoV-2 VOCs using SHINE fluorescence on full-genome  
 294 synthetic RNA standards and RNA extracted from viral seedstocks; target RNA concentration:  
 295 10<sup>4</sup> copies/μL. **e**, Mean fluorescence of 69/70 SHINEv2 assay on SARS-CoV-2 RNA extracted  
 296 from clinical samples, after 90 minutes. **f**, Discrimination of SARS-CoV-2 VOCs using SHINE  
 297 fluorescence of Delta assays on full-genome synthetic RNA standards, after 90 minutes. Target  
 298 RNA concentration: 10<sup>4</sup> genomes/μL. **(g,h)**, Colorimetric lateral flow based detection of full-  
 299 genome synthetic RNA standards using the **(g)** 156 - 158 and **(h)** SHINEv2 assays. SHINEv2  
 300 incubation time: 90 minutes. NTC, no target control. T, test line; C, control line. For **b** and **c**, center  
 301 = mean and error bars = s.d. for 3 technical replicates. In **d,e** and **f**, the heatmap values represent  
 302 the mean for 3 technical replicates.  
 303

304 position 417 in the S gene (i.e. K417N for Beta and K417T for Gamma), none of which are present  
305 on the reference genome or the Alpha VOC<sup>24,47</sup>. However, discriminating between 3 different  
306 codons in the same amino acid position using point-of-care diagnostics is remarkably difficult and,  
307 to our knowledge, has not been reported to date. We used a computational design technique (see  
308 Methods; manuscript *in prep.*) to generate crRNAs that maximize predicted SNP discrimination  
309 at position 417, and used ADAPT<sup>36</sup> to help in designing RPA primers for these crRNAs. After  
310 assay optimization, we demonstrated that our 417 assays can differentiate between the three  
311 genotypes with high accuracy (Fig. 3c and Supplementary Fig. 14). When tested on synthetic  
312 RNA targets, each 417 assay was shown to be at least 3x more active (i.e. higher fluorescence)  
313 on its preferred target than on the non-preferred targets (Fig. 3c).

314  
315 Having demonstrated the sensitivity and specificity of our 69/70 and 417 assays on short synthetic  
316 RNA targets, we next tested their performance on full genome synthetic RNA standards and on  
317 RNA extracted from SARS-CoV-2 viral seedstocks. In each case, these assays correctly identified  
318 the presence or absence of the mutations (Fig. 3d). For the Alpha VOC, the fluorescence signal  
319 of the derived crRNA was over 3x higher than that of the ancestral crRNA, indicating the presence  
320 of the 69/70 deletion. Conversely, the fluorescence signal for the ancestral crRNA was 1.25-3.5x  
321 higher for the reference strain as well as the Beta and Gamma VOCs, which confirmed the  
322 absence of the S gene deletion in these cases. Similarly, the genotype of each variant was  
323 correctly identified with the 417 assays, based on which crRNA showed the highest activity (Fig  
324 3d). For example, for the Gamma VOC, the derived T crRNA led to the highest fluorescence level,  
325 thereby correctly identifying the presence of the K417T SNP in this variant.

326  
327 Given the promising performance of these assays, we sought to assess their capacity to detect  
328 SARS-CoV-2 VOCs in clinical samples. We focused on validating the Alpha VOC assay, the only  
329 assay for which we had access to clinical samples, and reasoned that the results obtained could  
330 be extended to the other assays. We assessed the clinical performance of the 69/70 assay on  
331 RNA extracted from 20 NP swab samples. SHINEv2 correctly identified the presence of the 69/70  
332 deletion in the Alpha VOC-positive samples (Ct values 23 - 29), as indicated by the higher  
333 fluorescence with the derived crRNA in samples E6 to E10 (Fig. 3e). In addition, the 69/70 deletion  
334 assay showed excellent specificity (100%), detecting all RT-qPCR positive samples and none of  
335 the RT-qPCR negative samples (Fig. 3e).

336  
337 We further assessed the performance of the 69/70 assay on contrived unextracted samples. To  
338 emulate unextracted NP swab samples, we spiked in heat-inactivated viral seedstocks (reference  
339 strain or Alpha VOC) into SARS-CoV-2 negative clinical samples. Using a colorimetric lateral flow  
340 based readout, SHINEv2 correctly identified the presence or absence of the alpha VOC in the  
341 range of viral RNA concentrations ( $10^5$  -  $10^3$  cp/ $\mu$ L) tested (Supplementary Fig. 15). The presence  
342 of a test band for the ancestral crRNA and lack of it for the derived crRNA confirmed the presence  
343 of the 69/70 deletion in Alpha VOC positive contrived samples with lower viral RNA concentrations  
344 ( $10^4$  and  $10^3$  cp/ $\mu$ L). At higher viral RNA concentrations ( $10^5$  cp/ $\mu$ L), the presence or absence of  
345 the deletion was determined by the difference in test band intensity between the ancestral and  
346 derived crRNAs. Altogether, these data indicate that SHINEv2 can identify SARS-CoV-2 VOCs in  
347 clinical samples.

348  
349 SHINEv2 is a flexible technology that can be rapidly adapted to detect new viral variants. This  
350 allowed us to develop new SHINEv2 assays for the 452 and 156 - 158 mutations present in the  
351 Delta VOC, a VOC that arose as we were preparing this manuscript for publication. We designed  
352 a set of crRNAs and RPA primers for each assay as described above, and evaluated their  
353 performance on full genome synthetic RNA standards. Both assays successfully detected the  
354 mutations in synthetic RNA targets with high sensitivity and specificity (Supplementary Fig. 16).  
355 The 156-158 assay, in particular, displayed excellent specificity. Both the ancestral and derived  
356 crRNAs detected their respective targets with high accuracy while showing no detection for the  
357 opposite target (Supplementary Fig. 16b). Next, we examined the compatibility of these assays  
358 with lyophilization and ambient-temperature sample processing. These SHINEv2 assays showed  
359 excellent specificity on full genome synthetic RNA standards, clearly distinguishing the Delta VOC  
360 from the reference strain and the other VOCs (Fig 3f). The 452 and 156-158 assays correctly  
361 identified the genotype of each variant tested, based on the differential fluorescence activity of  
362 each crRNA pair. Additionally, both SHINEv2 assays correctly identified the presence or absence  
363 of each mutation using a colorimetric lateral flow based readout (Fig. 3g and 3h). All in all, we  
364 have developed mutation-specific SHINEv2 assays which are widely deployable and, in  
365 combination, can effectively discriminate between four widely circulating SARS-CoV-2 VOCs.

366  
367 *Towards at home SHINEv2 testing*  
368 SHINEv2 increases the accessibility of CRISPR-based SARS-CoV-2 diagnostics, and enables  
369 VOC identification outside of laboratory settings. However, further improvements are necessary  
370 for SHINEv2 to be used in virtually any environment. For example, the incorporation of internal  
371 controls or further simplifying the assay readout could greatly expand the use cases of SHINEv2,  
372 and enable its use in at home settings.

373  
374 Nucleic acid diagnostic tests often require an internal control as part of the regulatory approval  
375 process. Therefore, we designed and developed a Cas12-based assay for human RNase P, to  
376 serve as an internal control for SHINEv2. After optimizing the concentration of RPA primers, our  
377 RNase P assay was able to detect synthetic DNA down to 100 copies/ $\mu$ L (Supplementary Fig.  
378 17a and 17b). Next, we confirmed that this Cas12-based assay was compatible with the FastAmp  
379 lysis solution and with lyophilization. In this format, the Cas12-based RNase P assay detected  
380 synthetic DNA target down to 100 copies/ $\mu$ L using a fluorescence-based readout, which supports  
381 its potential use as an internal control for SHINEv2 (Fig. 4a). Therefore, we sought to determine  
382 the compatibility of the Cas12-based RNase P assay with the Cas13-based S gene assay and  
383 evaluate the performance of this duplex assay on synthetic nucleic acid targets. The duplex  
384 SHINEv2 assay successfully detected both targets, with an LOD of  $10^3$  copies/ $\mu$ L for each target  
385 (Supplementary Fig. 17c). Although additional improvements will be required to achieve clinically-  
386 relevant sensitivity with the duplex SHINEv2 assay, we have taken steps towards incorporating  
387 an internal control for SHINEv2. Moreover, our results confirmed that the improvements made to  
388 SHINEv2 are applicable to other systems, including in Cas12-based assays and potentially in  
389 other CRISPR-Dx.

390

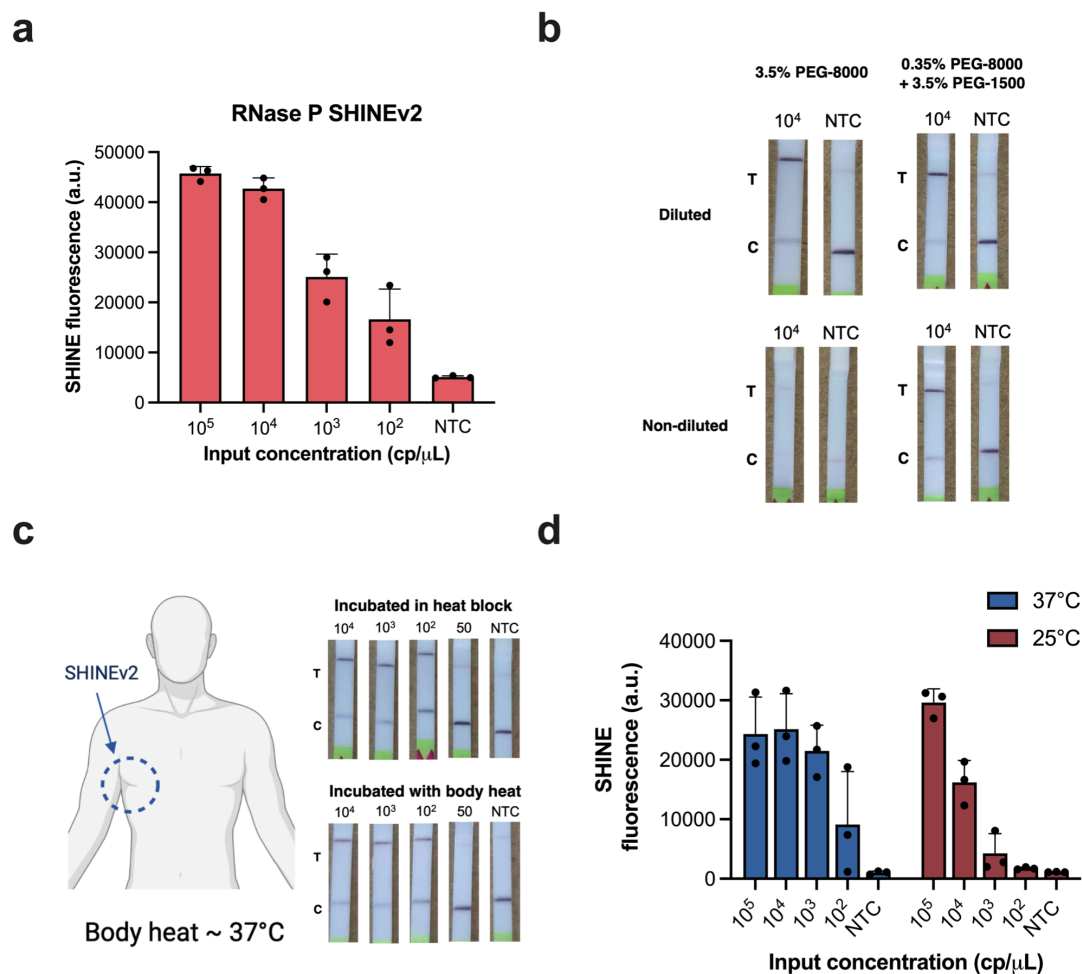

391  
 392 **Fig. 4 | Enhancing the accessibility of SHINEv2.** a, SHINE fluorescence of the RNase P  
 393 SHINEv2 assay on synthetic DNA target after 90 minutes; NTC, no target control. b, Lateral flow  
 394 based detection of SARS-CoV-2 RNA using SHINEv2 with different polyethylene glycol (i.e. PEG)  
 395 compositions; with or without dilution after a 90 minute incubation. NTC, no target control. c,  
 396 Lateral flow based SHINEv2 detection of SARS-CoV-2 RNA after a 90 minute incubation in a heat  
 397 block or using body heat (underarm incubation). NTC, no target control. d, SHINE fluorescence  
 398 on SARS-CoV-2 RNA after 90 minutes at 37°C or 25°C; NTC, no target control. For d, center =  
 399 mean and error bars = s.d. for 3 technical replicates.  
 400

401 Moreover, the accessibility of SHINEv2 could also be enhanced by further simplifying the assay.  
402 The lateral flow based readout for CRISPR-Dx, the preferred option for point-of-need  
403 implementation, requires a buffer to be added after the detection reaction is performed, increasing  
404 the risk of sample contamination and adding a liquid-handling step for the user. Directly inserting  
405 the paper strip into the SHINEv2 reaction would significantly reduce this risk. However, undiluted  
406 SHINEv2 reactions block the flow of nanoparticles through the paper strip, resulting in a failed  
407 test (Fig. 4b). We reasoned that high molecular weight PEG – an indispensable crowding agent  
408 for RPA – could be responsible for the lack of flow. We sought to identify a combination of PEGs  
409 with different molecular weights that enables flow while retaining SHINEv2's activity. In the  
410 absence of RNA targets, lowering the concentration and molecular weight of PEG in SHINEv2  
411 reactions facilitated the flow of nanoparticles through the paper strip (Supplementary Fig. 18a).  
412 However, the sensitivity of SHINEv2 was markedly reduced when lowering the concentration of  
413 PEG-8000 in the reaction (Supplementary Fig. 19). Using a combination of 0.35% PEG-8000 and  
414 3.5% PEG-1500, undiluted SHINEv2 was able to detect SARS-CoV-2 RNA without a drop in  
415 performance while retaining flow (Figure 4b and Supplementary Fig. 18b). Thus, we managed to  
416 eliminate a liquid handling step in SHINEv2 and simplify the test readout.

417  
418 In addition, SHINEv2 can be run without equipment due to its minimal heating requirements.  
419 SHINE's single 90-minute incubation step at 37°C can be easily maintained with low-cost and  
420 energy-efficient heat blocks. However, the removal of all heating elements would enable the  
421 unrestricted deployment of SHINEv2. Using body temperature, which is at approximately 37°C,  
422 could provide an alternative for fully equipment-free SHINEv2 testing<sup>49</sup>. Indeed, the underarm  
423 incubation of SHINEv2 was successful at detecting down to 100 cp/μL of SARS-CoV-2 RNA, and  
424 with a similar efficiency to SHINEv2 incubated in a heat block (Fig. 4c). An ideal test would perform  
425 with similar efficiency at ambient temperature as well. We examined the performance of SHINEv2  
426 at 25°C using both a plate-based fluorescence readout and a colorimetric paper-based readout.  
427 SHINEv2 was able to detect SARS-CoV-2 RNA at 25°C with the plate reader, albeit with lower  
428 speed and sensitivity than at 37°C (Fig. 4d). We observed a larger drop in sensitivity with the  
429 lateral flow based readout (Supplementary Fig. 20). We believe the drop in sensitivity was caused  
430 by a decline in the performance of RPA at lower temperatures<sup>50</sup>, since Cas13 detection alone  
431 performed well at 25°C and 37°C (Supplementary Fig. 21). Collectively, these improvements  
432 increase the accessibility of SHINEv2 and facilitate its use in almost any situation.

## 433 434 **Discussion**

435 Here we present SHINEv2, a widely deployable CRISPR-Dx for SARS-CoV-2 RNA detection and  
436 VOC identification from unextracted samples with a straightforward workflow. Previously  
437 developed CRISPR-Dx are not well poised for widespread deployment, as they are often too  
438 complex and/or require a cold chain and auxiliary equipment<sup>15,20,32</sup>. SHINEv2 addresses these  
439 limitations. Lyophilization considerably simplifies the assay and facilitates its transportation and  
440 storage. SHINEv2 can be distributed overseas without a loss in performance. Moreover, the use  
441 of an equipment-free and ambient-temperature sample lysis method further increases the user-  
442 friendliness of the assay. SHINEv2 involves as few steps from the user as antigen-capture tests,  
443 while providing a 50-fold boost in sensitivity<sup>7,42,43</sup>. Importantly, SHINEv2 demonstrates perfect



444 (100%) concordance with RT-qPCR, the gold standard for SARS-CoV-2 diagnosis, in samples  
445 with RNA levels above our analytical LoD of 200 copies/ $\mu$ L. This level of sensitivity could enable  
446 the detection of every potentially infectious individual, including those missed by antigen-capture  
447 tests<sup>10,46</sup>.

448  
449 SHINEv2 can accurately identify several clade-specific mutations in the Alpha, Beta, Gamma and  
450 Delta SARS-CoV-2 VOCs, and it can be rapidly adapted to respond to emerging viral variants as  
451 well as other viruses in current and future outbreaks. Thus, SHINEv2 can provide critical  
452 information to inform public health responses, and it fills a major gap in point-of-need diagnostics.  
453 At the population level, SHINEv2 could be used to prioritize testing and vaccine rollout in highly-  
454 affected communities or to select subsets of samples for further viral sequencing. SHINEv2 could  
455 also assist clinicians in selecting the right treatment (e.g. monoclonal antibody cocktails) for  
456 patients with severe COVID-19. Altogether, we believe that SHINEv2 will be especially valuable  
457 for community surveillance testing, as it combines user-friendly and equipment-free preparation  
458 methods with sufficient sensitivity and the capacity to discriminate VOCs.

459  
460 Further advances will be required for CRISPR-based diagnostic testing to take place in any  
461 location, including at-home settings. Ideally, such a test would involve a few simple, ambient-  
462 temperature steps and provide a fast and accurate visual readout without the need for specialized  
463 equipment. To our knowledge, current nucleic acid diagnostics are not capable of meeting all  
464 these requirements simultaneously. The combination of sample processing, nucleic acid  
465 amplification and CRISPR-based detection into a single, ambient-temperature reaction could  
466 remove liquid handling steps. The incorporation of solution-based, colorimetric readouts could  
467 further simplify the assay and reduce the risk of contamination<sup>51</sup>. Moreover, with SHINEv2, we  
468 have taken steps to eliminate all equipment needs, although additional advances will be required  
469 to boost SHINEv2's performance at ambient temperature. The speed and sensitivity of ambient-  
470 temperature CRISPR-Dx could be enhanced through the addition of auxiliary proteins or using  
471 alternative isothermal amplification methods<sup>18,21,52</sup>. Collectively, these improvements could greatly  
472 enhance the accessibility of SHINEv2 and provide a critical tool in the fight against current and  
473 future outbreaks. By reducing assay complexity and simplifying test distribution, without  
474 sacrificing sensitivity or specificity, we have taken steps towards the development of such a  
475 diagnostic tool.

476

## 477 **Methods**

478

### 479 *Clinical samples and ethics statement*

480 This study received a non-human subjects research determination from the Broad Institute Office  
481 of Research Subject Protections (NHSR-4318). To conduct this research, de-identified  
482 nasopharyngeal swab patient samples were purchased from Boca Biolistics (USA). Additional de-  
483 identified clinical samples were obtained from studies evaluated and approved at the Center for  
484 Disease Control and Prevention (CDC). This activity was reviewed by CDC and was conducted  
485 consistent with applicable federal law and CDC policy (See e.g., 45 C.F.R. part 46; 21 definition  
486 of research as defined in and was conducted consistent with C.F.R. part 56; 42 U.S.C. 241(d),  
487 46.102(l) but did not involve human applicable federal law and CDC U.S.C. 552a, 44 U.S.C. 3501  
488 et seq.)

489

### 490 *SARS-CoV-2 assay design and synthetic template information*

491 RPA primers were designed using ADAPT<sup>36</sup>. The S gene, which contains SNPs of interest in  
492 several SARS-CoV-2 VOCs, was extracted from an alignment of 308,315 SARS-CoV-2 genomes  
493 downloaded from GISAID in January 2021<sup>53,54</sup>. ADAPT was then run on the S gene alignment  
494 with the following parameters: 35-65% GC content, max. 1 mismatch between the primer and  
495 target, full coverage in >98% of the genomes and overlap allowed between amplicons but not  
496 primers. Forward RPA primers were ordered with a T7 promoter sequence (5'-  
497 GAAATTAATACGACTCACTATAGGG-3') appended upstream; and both forward and reverse  
498 RPA primers were purchased from Integrated DNA Technologies (IDT) as single-stranded DNA  
499 oligos.

500

501 The CRISPR RNAs (crRNAs) for SNP discrimination were designed using a generative sequence  
502 design algorithm<sup>55</sup>. This approach uses ADAPT's predictive model to predict the activity of  
503 candidate crRNA sequences against on-target and off-target sequences<sup>36</sup>. These predictions of  
504 candidate crRNA activity guide the generative algorithm's optimization process, in which it seeks  
505 to design crRNA probes that have maximal predicted on-target activity and minimal predicted off-  
506 target activity. These crRNAs were purchased from IDT as Alt-R CRISPR guide RNAs.

507

508 Synthetic DNA targets with an upstream T7 promoter sequence were ordered as double-stranded  
509 DNA (dsDNA) gene fragments from IDT, and were *in vitro* transcribed to generate synthetic RNA  
510 targets. *In vitro* transcription was conducted as previously described<sup>23</sup>. In brief, the dsDNA  
511 template was transcribed using the HiScribe T7 High Yield RNA Synthesis Kit (New England  
512 Biolabs (NEB)) for 2 hours at 37 °C. Transcribed RNA was then treated with RNase-free DNase  
513 I (QIAGEN) according to the manufacturer's instructions. Finally, DNase-treated RNA was purified  
514 using RNAClean SPRI XP beads using a 10:3:5 mixture of RNA solution, isopropanol and ethanol.

515

516 Sequence information for the synthetic targets, RPA primers, Cas13-crRNA and reporters is listed  
517 in Supplementary Table 2.

518

### 519 *Full-genome synthetic RNA controls and viral seedstocks*

520 Synthetic SARS-CoV-2 RNA controls (controls 2, 14, 16, 17 and 23) were purchased from Twist  
521 Biosciences and are referred to as full genome synthetic RNA standards.

522 Heat-inactivated viral stocks (2019-nCoV/USA-WA1/2020 as reference strain and  
523 USA/CA\_CDC\_5574/2020 as Alpha VOC) were purchased from ATCC.

524

#### 525 *Analysis of crRNA activity with Cas13a*

526 Initial measurements of crRNA activity were obtained under simplified SHINE conditions. That is,  
527 crRNA activity was measured using 1X optimized reaction buffer (20 mM HEPES pH 8.0 with 60  
528 mM KCl and 3.5% PEG-8000), 45 nM *LwaCas13a* protein, 125 nM polyU [*i.e.*, 6 uracils (6U) in  
529 length] quenched FAM reporter, 1 U/ $\mu$ L murine RNase inhibitor, 22.5 nM crRNA and 14mM  
530 magnesium acetate. Target RNA was added to each reaction at a ratio of 1:20 and fluorescence  
531 was measured on a Biotek Cytation 5 plate reader (excitation: 485 nm, emission: 520 nm) at 37  
532 °C every 5 minutes for up to 3 hours.

533

#### 534 *Nuclease inactivation with FastAmp Lysis reagent*

535 A concentrated (5X) version of FastAmp Viral and Cell solution B for Covid-19 Testing was  
536 purchased directly from Intact Genomics. This solution, referred to as FastAmp Lysis reagent,  
537 was used at a final concentration of 1X. For nuclease inactivation experiments, 10% healthy nasal  
538 fluid (Lee BioSolutions) in universal transport medium (UTM) was mixed with 1X lysis reagent and  
539 either 1%, 2% or 5% (v/v) murine RNase inhibitor (NEB). HUDSON treatment was used as a  
540 control for successful RNase inactivation and performed as previously described<sup>23</sup>. In short, 100  
541 mM TCEP (Thermo Fisher Scientific), 1 mM EDTA (Thermo Fisher Scientific) and 0.8 U/ $\mu$ L murine  
542 RNase inhibitor were added to the nasal fluid/UTM mix and incubated at 40 °C for 5 minutes. PBS  
543 was used instead of HUDSON reagents as a no-treatment control. All treated products were then  
544 mixed 1:1 with 400 mM RNaseAlertv2 substrate (Thermo Fisher Scientific) in nuclease-free water  
545 and incubated at 25°C, while measuring the fluorescence (excitation: 485 nm, emission: 520 nm)  
546 every 5 minutes for up to 30 minutes using a Biotek Cytation 5 plate reader.

547

#### 548 *Viral inactivation with Intact Genomics Lysis buffer*

549 2019-nCoV/USA-WA1-A12/2020 isolate of SARS-CoV-2 was obtained from the US Centers for  
550 Disease Control and Prevention (CDC). At the Integrated Research Facility (IRF) - Frederick, the  
551 virus was passaged by inoculating grivet kidney epithelial Vero cells (ATCC #CCL-81) at a  
552 multiplicity of infection (MOI) of 0.01 under high containment (BSL-3) conditions. Infected cells  
553 were incubated for 48 or 72 hours in Dulbecco's Modified Eagle Medium with 4.5g/L D-glucose,  
554 L-glutamine, and 110 mg/L sodium pyruvate (DMEM, Gibco) containing 2% heat-inactivated fetal  
555 bovine serum (SAFC Biosciences) in a humidified atmosphere at 37°C with 5% CO<sub>2</sub>. The resulting  
556 viral seedstock was harvested and quantified by plaque assay using Vero E6 cells (ATCC #CRL-  
557 1586) with a 2.5% Avicel overlay and stained after 48 hours with a 0.2% crystal violet stain.

558

559 For testing the viral inactivation capacity of FastAmp Lysis reagent, the viral stock (10<sup>7</sup> PFU/mL)  
560 was mixed with 1X lysis buffer supplemented with 5% (v/v) murine RNase inhibitor and incubated  
561 at ambient temperature for either A) 5 minutes, B) 20 minutes or C) 20 minutes followed by 10  
562 minutes at 65°C. A no-treatment (PBS) control was also included. Treated viral stocks were then

563 cleaned and quantified by plaque assay using Vero E6 cells (ATCC #CRL-1586) with a 2.5%  
564 Avicel overlay and stained after 48 hours with a 0.2% crystal violet stain.

565

566 *Single-step SARS-CoV-2 SHINE reactions.*

567 RPA primer and crRNA optimizations were performed using the following SHINE conditions: 1X  
568 original SHINE buffer (20 mM HEPES pH 8.0 with 60 mM KCl and 3.5% PEG-8000), 45 nM  
569 *LwaCas13a* protein resuspended in 1X SB (such that the resuspended protein is at 2.26  $\mu$ M), 125  
570 nM polyU quenched FAM reporter, 2 mM of each rNTP, 1 U/ $\mu$ L murine RNase inhibitor, 1 U/ $\mu$ L  
571 NextGen T7 RNA polymerase, 0.1 U/ $\mu$ L RNase H (NEB), 2 U/ $\mu$ L Invitrogen SuperScript IV (SSIV)  
572 reverse transcriptase (Thermo Fisher Scientific), an assay specific concentration of forward and  
573 reverse RPA primers (detailed below), and 22.5 nM crRNA. Once the master mix is created, it is  
574 used to resuspend the TwistAmp Basic Kit RPA pellets (1 lyophilized pellet per 102  $\mu$ L final master  
575 mix volume). After that, magnesium acetate (as the only magnesium cofactor) is added at a final  
576 concentration of 14 mM to generate the final master mix. Finally, a synthetic RNA target or a  
577 sample was added to the complete master mix at a ratio of 1:19. Fluorescence kinetics were  
578 measured on a Biotek Cytation 5 plate reader (excitation: 485 nm, emission: 520 nm) at 37 °C  
579 every 5 minutes for up to 3 hours.

580

581 For lateral flow readout, the quenched FAM reporter was exchanged for a biotinylated FAM  
582 reporter at a final concentration of 1  $\mu$ M. After incubation at 37°C for 90 minutes, the SHINE  
583 reaction was diluted 1:4 in 80 $\mu$ L HybriDetect Assay Buffer (Milenia Biotec), and a HybriDetect 1  
584 lateral flow strip was added. Test images were collected 5 minutes after the addition of the strip  
585 with a smartphone camera.

586

587 RPA primer concentrations varied between assays, but the ratio of forward to reverse primers  
588 was always kept to 1:1. For each assay, the concentration of forward and reverse RPA primer  
589 was the following: 120nM for ORF1a and 417 assays; 160nM for 452 assay and 180nM for S  
590 gene, 69/70 deletion and 156-158 assays.

591

592 *SHINE tolerance to samples inactivated with lysis solution*

593 Contrived nasal samples (10% (v/v) in UTM) were inactivated with lysis solution (FastAmp lysis  
594 reagent with 5% RNase inhibitor) for 5 minutes at ambient temperature. SHINE reactions were  
595 generated as described above, except a variable amount of water was replaced with inactivated  
596 contrived nasal samples. Synthetic RNA target (with the concentration specified in the figure) was  
597 added to the modified SHINE reactions at a ratio of 1:19. Plate-based fluorescence detection was  
598 performed as described above. In these reactions, the inactivated sample volume comprised 0%  
599 - 40% of the total volume.

600

601 *Lyophilization optimization for SHINE*

602 The original SHINE buffer was optimized to retain SHINE's activity after lyophilization. For  
603 lyophilization, we generated the master mix as described above, except the 1X SHINE buffer was  
604 substituted for 1X lyophilization buffer (composition described below) and magnesium acetate  
605 was omitted. The mastermix was aliquoted, flash frozen in liquid nitrogen and lyophilized  
606 overnight. The lyophilization buffers tested had the following composition: 1) SHINE (20 mM

607 HEPES pH 8.0 with 60 mM KCl and 3.5% PEG-8000); 2) SHINE without PEG and KCl (20 mM  
608 HEPES pH 8.0), 3) SHINE with sucrose and mannitol (20 mM HEPES pH 8.0 with 60 mM KCl,  
609 3.5% PEG-8000, 5% (w/v) sucrose and 150mM mannitol); 4) LYO (20 mM HEPES pH 8.0 with  
610 5% w/v sucrose and 150mM mannitol). Lyophilized pellets were resuspended with a buffer  
611 composed of magnesium acetate (14 mM final concentration) and whichever reagent was left out  
612 of the original SHINE buffer (e.g. 60 mM KCl, 3.5% PEG-8000 and 14 mM magnesium acetate  
613 for the LYO resuspension buffer (RB)). After resuspension, synthetic RNA target was added to  
614 the resuspended SHINE reactions at a ratio of 1:19. Plate-based fluorescence detection or lateral  
615 flow based detection were performed as described above.

616  
617 Lyophilized SHINE pellets for stability testing were prepared using the LYO buffer as described  
618 above. SHINE pellets were stored at room temperature, 4°C or -20°C for 4,7,14,21 or 28 prior to  
619 resuspension and testing. For SHINEv2 testing in Nigeria, SHINE pellets were lyophilized in the  
620 United States, shipped in dry ice to Nigeria and then resuspended and tested after a total of 6  
621 weeks in storage.

622  
623 *Side-by-side clinical sample testing*  
624 Clinical samples were thawed on ice. SHINEv2, BinaxNow and CareStart testing as well as RNA  
625 extractions and RT-qPCR were performed side-by-side, according to the manufacturer's  
626 instructions (see details below). 96 nasopharyngeal swab samples were tested in batches of 24  
627 samples.

628  
629 Information on clinical samples, including C<sub>t</sub> values, can be found in Supplementary Table 1.  
630 Clinical sample test results in Supplementary Fig. 8 - 10.

631  
632 *Clinical sample extractions and RT-qPCR*  
633 Clinical sample extractions and RT-qPCR were performed according to the CDC's recommended  
634 protocol<sup>41</sup>. Nucleic acid extractions for samples S1 - S96 were performed using the QIAamp Viral  
635 RNA Mini Kit (Qiagen). The starting volume for extraction was 100 µL and extracted nucleic acid  
636 was eluted into 100 µL of nuclease-free water. Extracted RNA was used immediately or stored at  
637 -80C. Extracted RNA was tested for the presence of SARS-CoV-2 RNA using the CDC's SARS-  
638 CoV-2 RT-qPCR assay (2019-nCoV CDC EUA Kit, IDT). RT-qPCR cycling conditions were as  
639 follows: hold at 25°C for 2 min, reverse transcription at 50 °C for 15 min, polymerase activation at  
640 95 °C for 2 min and 45 cycles with a denaturing step at 95 °C for 3 s followed by annealing and  
641 elongation steps at 55 °C for 30 s. RT-qPCR was run on a QuantStudio 6 (Applied Biosystems)  
642 and data were analyzed using the Standard Curve (SC) module of the Applied Biosystems  
643 Analysis Software.

644  
645 *SHINEv2 testing - clinical samples*  
646 SHINEv2 reactions were prepared the day before testing and consist of 1X optimized  
647 lyophilization buffer (20 mM HEPES pH 8.0 with 5% w/v sucrose and 150mM mannitol), 45 nM  
648 LwaCas13a protein resuspended in 1X SB (such that the resuspended protein is at 2.26 µM), 1  
649 µM lateral flow biotinylated FAM reporter, 2 mM of each rNTP, 1 U/µL murine RNase inhibitor, 1  
650 U/µL NextGen T7 RNA polymerase, 0.1 U/µL RNase H (NEB), 2 U/µL Invitrogen SuperScript IV



651 (SSIV) reverse transcriptase (Thermo Fisher Scientific), 180nM forward and reverse RPA primers  
652 and 22.5 nM crRNA. Once the master mix was created, it was used to resuspend the TwistAmp  
653 Basic Kit lyophilized reaction components (1 lyophilized pellet per 102  $\mu$ L final master mix  
654 volume). The mastermix was aliquoted into individual reactions (20 $\mu$ L final), flash frozen in liquid  
655 nitrogen and lyophilized overnight.

656  
657 The following day, clinical samples were mixed with lysis reagent (diluted to 1X) with 5% RNase  
658 inhibitor and incubated at ambient temperature for 5 minutes. In the meantime, the lyophilized  
659 SHINEv2 pellets were resuspended with Resuspension Buffer to 1X (60 mM KCl, 3.5% PEG-  
660 8000 and 14mM magnesium acetate). Inactivated clinical samples were added to the  
661 resuspended SHINEv2 reactions at a ratio of 1:9. After incubation at 37C for 90 minutes, the  
662 SHINEv2 reaction was diluted in 80 $\mu$ L HybriDetect Assay Buffer, and a HybriDetect 1 lateral flow  
663 strip was added. Test images were collected 5 minutes after the addition of the strip. Tests were  
664 considered positive when the intensity of the test band was higher than that of the negative  
665 controls.

666  
667 *BinaxNow COVID - 19 Antigen self-test - clinical samples*  
668 BinaxNow COVID-19 Antigen self-tests (Abbott) were purchased from Walmart. Since we were  
669 not able to procure dry swabs, the test was performed according to the manufacturers' protocol  
670 for determining the analytical sensitivity with a liquid input (Instructions For Use submitted for FDA  
671 EUA)<sup>56</sup>. Briefly, 6 drops of BinaxNow liquid were added to the top hole of each test card. 20 $\mu$ L of  
672 clinical samples were absorbed onto a clinical swab. The swab was then inserted into the bottom  
673 hole of the test card and turned 3 times. Without removing the swab, the test card was closed and  
674 sealed. The test was incubated at room temperature for at least 15 minutes before imaging with  
675 a smartphone camera. Any faint colored lines in the test region were considered as positive.

676  
677 *CareStart COVID-19 Antigen testing - clinical samples*  
678 CareStart COVID-19 Antigen tests (Access Bio) were purchased from Medek Health. The test  
679 was performed according to the manufacturer instructions for use<sup>57</sup>. Briefly, clinical samples were  
680 mixed 1:1 with the extraction buffer. 3 drops of that mix were added onto the sample well in a test  
681 cartridge and incubated at ambient temperature for at least 10 minutes before imaging with a  
682 smartphone camera. As suggested by the manufacturer, any faint colored line in the test region  
683 was considered as positive.

684  
685 *Contrived samples testing (VOCs)*  
686 Contrived samples were created by diluting a known concentration of heat-inactivated viral  
687 seedstocks (reference strain or Alpha VOC) 1:9 in UTM. Contrived samples were then inactivated  
688 with lysis solution for 5 minutes at ambient temperature. Lyophilized SHINEv2 pellets were  
689 prepared and resuspended as described above. Inactivated samples were added to the  
690 resuspended SHINEv2 reactions at a ratio of 1:9. After incubation at 37°C for 90 minutes, the  
691 SHINEv2 reaction was diluted in 80 $\mu$ L HybriDetect Assay Buffer, and a Milenia HybriDetect 1  
692 lateral flow strip was added. Test images were collected 5 minutes after the addition of the strip.

693  
694 *Extracted clinical samples testing (VOCs)*

695 Clinical sample extractions and RT-qPCR were performed according to the CDC's recommended  
696 protocol<sup>41</sup>. Nucleic acid extraction for samples E6 - E10 were performed with the MagnaPure 96  
697 instrument using the DNA and viral SV kit (Roche). The starting volume for extraction was 100  $\mu$ L  
698 and extracted nucleic acid was eluted into 100  $\mu$ L of nuclease-free water. Extracted RNA was  
699 used immediately or stored at -80C. Extracted RNA was tested for the presence of SARS-CoV-2  
700 RNA using the CDC's SARS-CoV-2 RT-qPCR assay (2019-nCoV CDC EUA Kit, IDT). RT-qPCR  
701 cycling conditions were as follows: hold at 25°C for 2 min, reverse transcription at 50 °C for 15  
702 min, polymerase activation at 95 °C for 2 min and 45 cycles with a denaturing step at 95 °C for 3  
703 s followed by annealing and elongation steps at 55 °C for 30 s. RT-qPCR was run on a  
704 QuantStudio 6 (Applied Biosystems) and data were analyzed using the Standard Curve (SC)  
705 module of the Applied Biosystems Analysis Software.

706  
707 RNA extracted from clinical samples was added to resuspended SHINEv2 reactions at a ratio of  
708 1:9, as described above. After incubation at 37°C for 90 minutes, the SHINEv2 reaction was  
709 diluted in 80 $\mu$ L HybriDetect Assay Buffer, and a HybriDetect 1 lateral flow strip was added. Test  
710 images were collected 5 minutes after the addition of the strip.

711  
712 *Cas12-based RNase P assay*  
713 Cas12-based SHINEv2 reactions were prepared as follows: 1X original SHINE buffer or LYO  
714 buffer, 20 nM *LbaCas12a*, 250nM polyC [*i.e.*, 5 cytosines (5C) in length] quenched HEX reporter,  
715 1 U/ $\mu$ L murine RNase inhibitor, 90nM of forward and reverse RPA primers, and 22.5 nM Cas12a  
716 crRNA were combined to create a master mix. The master mix was used to resuspend the  
717 TwistAmp Basic Kit RPA pellets (1 lyophilized pellet per 102  $\mu$ L final master mix volume). For  
718 lyophilization, the magnesium acetate was omitted, and individual reactions were aliquoted, flash  
719 frozen and lyophilized overnight. Otherwise, magnesium acetate (as the only magnesium  
720 cofactor) was added at a final concentration of 14 mM. Lyophilized Cas12 reactions were  
721 reactivated with Resuspension Buffer, as described above. Finally, synthetic DNA target was  
722 added to the complete master mix at a ratio of 1:19. Fluorescence kinetics were measured on a  
723 Biotek Cytation 5 plate reader (excitation: 485 nm, emission: 520 nm) at 37 °C every 5 minutes  
724 for up to 3 hours. For lateral flow readout, the quenched HEX reporter was exchanged for a 5C  
725 biotinylated FAM reporter at a final concentration of 1  $\mu$ M. After incubation at 37°C for 90 minutes,  
726 the Cas12-based reaction was diluted in 80 $\mu$ L HybriDetect Assay Buffer, and a HybriDetect 1  
727 lateral flow strip was added. Test images were collected 5 minutes after the addition of the strip.

728  
729 *Duplex SHINEv2*  
730 Duplex SARS-CoV-2 and RNase P SHINEv2 reactions were prepared as follows: 1X original  
731 SHINE buffer or 1X LYO buffer, 45 nM *LwaCas13a*, 20nM *LbaCas12a*, 125 nM polyU quenched  
732 FAM reporter, 250nM polyC quenched HEX reporter, 2 mM of each rNTP, 1 U/ $\mu$ L murine RNase  
733 inhibitor, 1 U/ $\mu$ L NextGen T7 RNA polymerase, 0.1 U/ $\mu$ L RNase H, 2 U/ $\mu$ L Invitrogen SuperScript  
734 IV (SSIV) reverse transcriptase, 90nM S gene RPA primers, 90nM RNase P RPA primers, 22.5  
735 nM Cas12a crRNA and 22.5 nM Cas13a crRNA were combined to create a master mix. The  
736 mastermix was then used to resuspend the TwistAmp Basic Kit RPA pellets (1 lyophilized pellet  
737 per 102  $\mu$ L final master mix volume). After that, pre- and post-lyophilization reactions were  
738 performed as previously described.

739

#### 740 *PEG experiments*

741 To evaluate the effect of PEG composition and concentration on flow through the lateral flow strip,  
742 SHINEv2 reactions were prepared as described above, except the 3.5% PEG-8000 present in  
743 the original SHINE buffer was exchanged for 0 - 10% PEG-8000, PEG-1500 or a combination of  
744 the two. Without adding synthetic targets and with or without diluting in HybriDetect Assay Buffer,  
745 a Milenia HybriDetect 1 lateral flow strip was added to these modified reactions. Test images were  
746 collected 5 minutes after the addition of the strip.

747

748 To evaluate the performance of SHINEv2 with modified PEG composition, SHINEv2 reactions  
749 were performed as described above, except the composition of the original SHINE and  
750 resuspension buffers was modified to be SHINE (20 mM HEPES pH 8.0 with 60 mM KCl, 0.35%  
751 PEG-8000 and 3.5% PEG-1500) and resuspension buffer (60 mM KCl, 0.35% PEG-8000, 3.5%  
752 PEG-1500 and 14mM magnesium acetate).

753

#### 754 *Body heat experiments*

755 Lyophilized SHINEv2 pellets were prepared and resuspended as described above. Full genome  
756 synthetic RNA standards were added to individual SHINEv2 reactions and incubated using body  
757 heat or a heat block for 90 minutes. For body heat experiments, SHINEv2 reactions were closed,  
758 inserted in a ziploc bag, taped to the underarm of one of the researchers and incubated for 90  
759 minutes. The reactions were then diluted in 80 $\mu$ L HybriDetect Assay Buffer, and a HybriDetect 1  
760 lateral flow strip was added to each reaction. Test images were collected 5 minutes after the  
761 addition of the strip.

762

#### 763 *Room temperature experiments*

764 Lyophilized SHINEv2 pellets were prepared and later resuspended as described above. Contrived  
765 nasal samples were inactivated with lysis solution and added to the resuspended SHINEv2  
766 reactions at a ratio of 1:9. Fluorescence kinetics were measured on a Biotek Cytation 5 plate  
767 reader (excitation: 485 nm, emission: 520 nm) every 5 minutes for up to 3 hours, at either 37 °C  
768 or 25 °C.

769

#### 770 *Data analysis and schematic generation*

771 SHINE fluorescence values are reported as background-subtracted fluorescence, with the  
772 fluorescence value collected before reaction progression (usually  $t = 10$  minutes) subtracted from  
773 the final fluorescence value (90 minutes, unless otherwise indicated). Since the SHINEv2 VOC  
774 data was collected using different plate-readers, SHINE fluorescence in Fig. 3 was normalized.  
775 For normalization, the maximal fluorescence value in an experiment is set to 1 and the  
776 fluorescence values from that same experiment are set as ratios of the max. fluorescence value.

777

778 Schematics shown in Fig. 1a, 1d, 2a, 3a, 4c and Supplementary Fig. 5 were created using  
779 [www.biorender.com](https://www.biorender.com). Data panels were primarily generated using Prism 8 (GraphPad).

780

781 **References**

- 782 1. Emerging COVID-19 success story: South Korea learned the lessons of MERS.  
783 <https://ourworldindata.org/covid-exemplar-south-korea>.
- 784 2. Summers, J. *et al.* Potential lessons from the Taiwan and New Zealand health responses to  
785 the COVID-19 pandemic. *Lancet Reg Health West Pac* **4**, 100044 (2020).
- 786 3. Pavelka, M. *et al.* The impact of population-wide rapid antigen testing on SARS-CoV-2  
787 prevalence in Slovakia. *Science* **372**, 635–641 (2021).
- 788 4. Walensky, R. P. & del Rio, C. From Mitigation to Containment of the COVID-19 Pandemic.  
789 *JAMA* vol. 323 1889 (2020).
- 790 5. Mina, M. J. & Andersen, K. G. COVID-19 testing: One size does not fit all. *Science* **371**,  
791 126–127 (2021).
- 792 6. Mögling, R. *et al.* Delayed laboratory response to COVID-19 caused by molecular  
793 diagnostic contamination. *Emerg. Infect. Dis.* **26**, 1944–1946 (2020).
- 794 7. McKay, S. L. *et al.* Performance Evaluation of Serial SARS-CoV-2 Rapid Antigen Testing  
795 During a Nursing Home Outbreak. *Ann. Intern. Med.* (2021) doi:10.7326/M21-0422.
- 796 8. Ferguson, J. *et al.* Validation testing to determine the sensitivity of lateral flow testing for  
797 asymptomatic SARS-CoV-2 detection in low prevalence settings: Testing frequency and  
798 public health messaging is key. *PLoS Biol.* **19**, e3001216 (2021).
- 799 9. van Kampen, J. J. A. *et al.* Duration and key determinants of infectious virus shedding in  
800 hospitalized patients with coronavirus disease-2019 (COVID-19). *Nat. Commun.* **12**, 267  
801 (2021).
- 802 10. Pray, I. W. *et al.* Performance of an Antigen-Based Test for Asymptomatic and  
803 Symptomatic SARS-CoV-2 Testing at Two University Campuses - Wisconsin, September-  
804 October 2020. *MMWR Morb. Mortal. Wkly. Rep.* **69**, 1642–1647 (2021).
- 805 11. Rabe, B. A. & Cepko, C. SARS-CoV-2 detection using isothermal amplification and a rapid,  
806 inexpensive protocol for sample inactivation and purification. *Proc. Natl. Acad. Sci. U. S. A.*

- 807           **117**, 24450–24458 (2020).
- 808   12. Thi, V. L. D. *et al.* A colorimetric RT-LAMP assay and LAMP-sequencing for detecting  
809           SARS-CoV-2 RNA in clinical samples. *Sci. Transl. Med.* **12**, (2020).
- 810   13. Lucira™ COVID-19 Test Kit Instructions for Use.  
811           <https://www.fda.gov/media/147494/download>.
- 812   14. Land, K. J., Boeras, D. I., Chen, X.-S., Ramsay, A. R. & Peeling, R. W. REASSURED  
813           diagnostics to inform disease control strategies, strengthen health systems and improve  
814           patient outcomes. *Nat Microbiol* **4**, 46–54 (2019).
- 815   15. Gootenberg, J. S. *et al.* Nucleic acid detection with CRISPR-Cas13a/C2c2. *Science* **356**,  
816           438–442 (2017).
- 817   16. Chen, J. S. *et al.* CRISPR-Cas12a target binding unleashes indiscriminate single-stranded  
818           DNase activity. *Science* **360**, 436–439 (2018).
- 819   17. Li, S.-Y. *et al.* CRISPR-Cas12a-assisted nucleic acid detection. *Cell Discov* **4**, 20 (2018).
- 820   18. Gootenberg, J. S. *et al.* Multiplexed and portable nucleic acid detection platform with  
821           Cas13, Cas12a, and Csm6. *Science* **360**, 439–444 (2018).
- 822   19. Myhrvold, C. *et al.* Field-deployable viral diagnostics using CRISPR-Cas13. *Science* **360**,  
823           444–448 (2018).
- 824   20. Fozouni, P. *et al.* Amplification-free detection of SARS-CoV-2 with CRISPR-Cas13a and  
825           mobile phone microscopy. *Cell* **184**, 323–333.e9 (2021).
- 826   21. Liu, T. Y. *et al.* Accelerated RNA detection using tandem CRISPR nucleases. *medRxiv*  
827           (2021) doi:10.1101/2021.03.19.21253328.
- 828   22. Joung, J. *et al.* Detection of SARS-CoV-2 with SHERLOCK One-Pot Testing. *N. Engl. J.*  
829           *Med.* **383**, 1492–1494 (2020).
- 830   23. Arizti-Sanz, J. *et al.* Streamlined inactivation, amplification, and Cas13-based detection of  
831           SARS-CoV-2. *Nat. Commun.* **11**, 5921 (2020).
- 832   24. Harvey, W. T. *et al.* SARS-CoV-2 variants, spike mutations and immune escape. *Nat. Rev.*



- 833 *Microbiol.* **19**, 409–424 (2021).
- 834 25. Konings, F. *et al.* SARS-CoV-2 Variants of Interest and Concern naming scheme conducive  
835 for global discourse. *Nat Microbiol* **6**, 821–823 (2021).
- 836 26. Volz, E. *et al.* Assessing transmissibility of SARS-CoV-2 lineage B.1.1.7 in England. *Nature*  
837 **593**, 266–269 (2021).
- 838 27. Lemieux, J. E. *et al.* Phylogenetic analysis of SARS-CoV-2 in Boston highlights the impact  
839 of superspreading events. *Science* **371**, (2021).
- 840 28. Borges, V. *et al.* Tracking SARS-CoV-2 lineage B.1.1.7 dissemination: insights from  
841 nationwide spike gene target failure (SGTF) and spike gene late detection (SGTL) data,  
842 Portugal, week 49 2020 to week 3 2021. *Euro Surveill.* **26**, (2021).
- 843 29. Vogels, C. B. F. *et al.* Multiplex qPCR discriminates variants of concern to enhance global  
844 surveillance of SARS-CoV-2. *PLoS Biol.* **19**, e3001236 (2021).
- 845 30. Brito, A. F. *et al.* Global disparities in SARS-CoV-2 genomic surveillance. (2021)  
846 doi:10.1101/2021.08.21.21262393.
- 847 31. Ackerman, C. M. *et al.* Massively multiplexed nucleic acid detection with Cas13. *Nature* vol.  
848 582 277–282 (2020).
- 849 32. Casati, B. *et al.* ADESSO detects SARS-CoV-2 and its variants: extensive clinical validation  
850 of an optimised CRISPR-Cas13-based COVID-19 test. doi:10.1101/2021.06.17.21258371.
- 851 33. Jiao, C. *et al.* Noncanonical crRNAs derived from host transcripts enable multiplexable  
852 RNA detection by Cas9. *Science* **372**, 941–948 (2021).
- 853 34. Chakraborty, D., Agrawal, A. & Maiti, S. Rapid identification and tracking of SARS-CoV-2  
854 variants of concern. *The Lancet* vol. 397 1346–1347 (2021).
- 855 35. de Puig, H. *et al.* Minimally instrumented SHERLOCK (miSHERLOCK) for CRISPR-based  
856 point-of-care diagnosis of SARS-CoV-2 and emerging variants. *Sci Adv* **7**, (2021).
- 857 36. Metsky, H. C. *et al.* Designing viral diagnostics with model-based optimization. *bioRxiv*  
858 2020.11.28.401877 (2021) doi:10.1101/2020.11.28.401877.

- 859 37. Qian, J. *et al.* An enhanced isothermal amplification assay for viral detection. *Nat.*  
860 *Commun.* **11**, 5920 (2020).
- 861 38. Policy for Coronavirus Disease-2019 Tests During the Public Health Emergency.  
862 <https://www.fda.gov/media/135659/download>.
- 863 39. Perchetti, G. A., Huang, M.-L., Mills, M. G., Jerome, K. R. & Greninger, A. L. Analytical  
864 Sensitivity of the Abbott BinaxNOW COVID-19 Ag Card. *J. Clin. Microbiol.* **59**, (2021).
- 865 40. Xun, G., Lane, S. T., Petrov, V. A., Pepa, B. E. & Zhao, H. A rapid, accurate, scalable, and  
866 portable testing system for COVID-19 diagnosis. *Nat. Commun.* **12**, 2905 (2021).
- 867 41. CDC 2019-Novel Coronavirus (2019-nCoV) Real-Time RT-PCR Diagnostic Panel.  
868 <https://www.fda.gov/media/134922/download>.
- 869 42. Pollock, N. R. *et al.* Performance and Implementation Evaluation of the Abbott BinaxNOW  
870 Rapid Antigen Test in a High-throughput Drive-through Community Testing Site in  
871 Massachusetts. doi:10.1101/2021.01.09.21249499.
- 872 43. Pollock, N. R. *et al.* Performance and Operational Evaluation of the Access Bio CareStart  
873 Rapid Antigen Test in a High-throughput Drive-through Community Testing Site in  
874 Massachusetts. doi:10.1101/2021.03.07.21253101.
- 875 44. Allan-Blitz, L.-T. & Klausner, J. D. A Real-World Comparison of SARS-CoV-2 Rapid  
876 Antigen vs. Polymerase Chain Reaction Testing in Florida. *J. Clin. Microbiol.* JCM0110721  
877 (2021) doi:10.1128/JCM.01107-21.
- 878 45. Okoye, N. C. *et al.* Performance Characteristics of BinaxNOW COVID-19 Antigen Card for  
879 Screening Asymptomatic Individuals in a University Setting. *J. Clin. Microbiol.* **59**, (2021).
- 880 46. Paltiel, A. D., Zheng, A. & Walensky, R. P. Assessment of SARS-CoV-2 Screening  
881 Strategies to Permit the Safe Reopening of College Campuses in the United States. *JAMA*  
882 *Netw Open* **3**, e2016818 (2020).
- 883 47. Hodcroft, E. B. CoVariants: SARS-CoV-2 Mutations and Variants of Interest.  
884 <https://covariants.org/> (2021).

- 885 48. Planas, D. *et al.* Reduced sensitivity of SARS-CoV-2 variant Delta to antibody  
886 neutralization. *Nature* **596**, 276–280 (2021).
- 887 49. Crannell, Z. A., Rohrman, B. & Richards-Kortum, R. Equipment-free incubation of  
888 recombinase polymerase amplification reactions using body heat. *PLoS One* **9**, e112146  
889 (2014).
- 890 50. Evaluation of Isothermal Recombinase Polymerase Amplification Incubation Temperature  
891 Tolerance. *Biotechniques* **61**, 328 (2016).
- 892 51. Yuan, C.-Q. *et al.* Universal and naked-eye gene detection platform based on  
893 CRISPR/Cas12a/13a system. doi:10.1101/615724.
- 894 52. Carter, J. G. *et al.* Ultrarapid detection of SARS-CoV-2 RNA using a reverse transcription–  
895 free exponential amplification reaction, RTF-EXPAR. *Proc. Natl. Acad. Sci. U. S. A.* **118**,  
896 (2021).
- 897 53. Elbe, S. & Buckland-Merrett, G. Data, disease and diplomacy: GISAID’s innovative  
898 contribution to global health. *Glob Chall* **1**, 33–46 (2017).
- 899 54. Shu, Y. & McCauley, J. GISAID: Global initiative on sharing all influenza data – from vision  
900 to reality. *Euro Surveill.* **22**, (2017).
- 901 55. Mantena. *In preparation*.
- 902 56. BinaxNOW COVID-19 Antigen Self TEST. <https://www.fda.gov/media/147254/download>.
- 903 57. CareStart COVID-19 Antigen Rapid Diagnostic Test for the Detection of SARS-CoV-2  
904 Antigen. <https://www.fda.gov/media/142919/download>.

## 905 **Acknowledgements**

906 We would like to thank the TIDE group at the Broad Institute for providing additional laboratory  
907 space to perform the work; all the researchers and laboratories who generously made SARS-  
908 CoV-2 sequencing data publicly available, to inform the design of our assay; H. Metsky, for his  
909 contributions to the development of ADAPT, which guided the assay design; the Sabeti laboratory,  
910 notably S. Siddiqui, H. Metsky, E. Normandin for their thoughtful discussions and reading of the  
911 manuscript. Funding was provided by DARPA D18AC00006. This work is made possible by  
912 support from Flu Lab and a cohort of generous donors through TED's Audacious Project, including  
913 the ELMA Foundation, MacKenzie Scott, the Skoll Foundation, and Open Philanthropy. J.A.-S. is  
914 supported by a fellowship from "la Caixa" Foundation (ID 100010434, code  
915 LCF/BQ/AA18/11680098). C.M. is supported by start-up funds from Princeton University. For  
916 L.W., this work was funded under Agreement No. HSHQDC-15-C-00064 awarded to Battelle  
917 National Biodefense Institute (BNBI) by the Department of Homeland Security (DHS) Science and  
918 Technology (S&T) Directorate for the management and operation of the National Biodefense  
919 Analysis and Countermeasures Center (NBACC), a Federally Funded Research and  
920 Development Center.

921  
922 The views, opinions, conclusions, and/or findings expressed should not be interpreted as  
923 representing the official views or policies, either expressed or implied, of the Department of  
924 Defense, US government, National Institute of General Medical Sciences, DHS, or the National  
925 Institutes of Health. The DHS does not endorse any products or commercial services mentioned  
926 in this presentation. In no event shall the DHS, BNBI or NBACC have any responsibility or liability  
927 for any use, misuse, inability to use, or reliance upon the information contained herein. In addition,  
928 no warranty of fitness for a particular purpose, merchantability, accuracy or adequacy is provided  
929 regarding the contents of this document. Notice: This manuscript has been authored by Battelle  
930 National Biodefense Institute, LLC under Contract No. HSHQDC-15-C-00064 with the U.S.  
931 Department of Homeland Security. The United States Government retains and the publisher, by  
932 accepting the article for publication, acknowledges that the United States Government retains a  
933 non-exclusive, paid up, irrevocable, world-wide license to publish or reproduce the published form  
934 of this manuscript, or allow others to do so, for United States Government purposes.

## 935 936 **Contributions**

937 J.A.-S. and C.A.F. conceived this study under the guidance of P.C.S. and C.M. J.A.-S., A.B,  
938 C.K.B, C.A.F., M.E.G., T.-S.F.K.-T. and G.K. performed initial experiments to improve the SHINE  
939 technology. G.K. and R.G. performed viral inactivation experiments, under the guidance of L.E.H.  
940 J.A.-S., A.B., C.K.B. and M.E.G performed experiments and data analysis related to the S gene  
941 assay and the development of SHINEv2. J.N.U, P.E.E and O.G.J. performed SHINEv2  
942 experiments in Nigeria, under the supervision of C.T.H. J.A.-S., A.B., N.L.W, P.P.P. and S.M.  
943 designed and/or tested SHINEv2 assays for SARS-CoV-2 variant detection. J.S.L. provided  
944 assistance in patient sample collection. J.A.-S. and A.B performed and analyzed experiments with  
945 patient samples. Y.B.Z. designed and validated Cas12-based SHINEv2 assays. L.E.H., C.T.H.  
946 and J.J. provided critical insights on protocols, the experimental results, and the work overall.  
947 J.A.-S. wrote the paper with guidance from P.C.S. and C.M. P.C.S and C.M. jointly supervised  
948 the project. All authors reviewed the manuscript.

949

950 **Competing interests**

951 C.A.F., P.C.S., and C.M. are co-inventors on patent PCT/US2018/022764, which covers the  
952 SHERLOCK and HUDSON technology for viral RNA detection held by the Broad Institute. J.A.-  
953 S., C.A.F., P.C.S., and C.M. are co-inventors on a US Provisional Patent Application directed to  
954 SHINE technology. P.C.S. is a co-founder of, shareholder in, and advisor to Sherlock Biosciences,  
955 Inc., as well as a Board member of and shareholder in Danaher Corporation. All other authors  
956 declare no competing interests.

957



958 **Supplementary material**

959

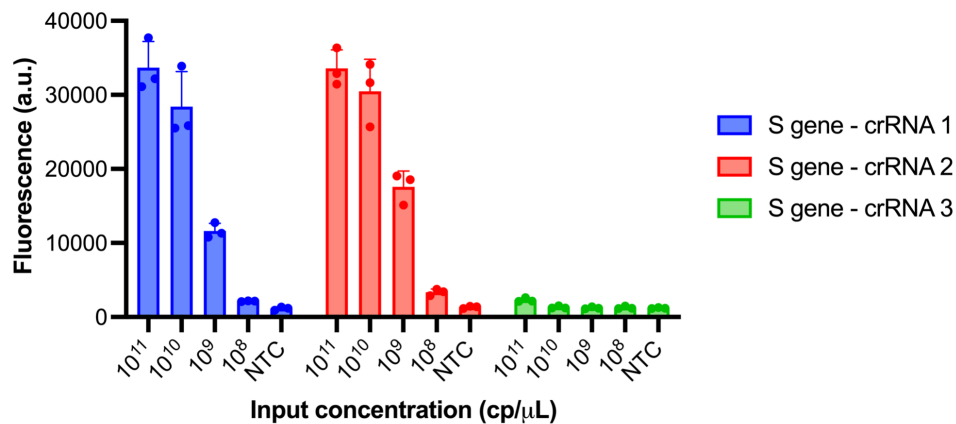

960 **Supplementary Fig. 1 | Selection of most active S gene crRNA.** Cas13a detection of synthetic  
961 RNA target (S gene) using different crRNAs. NTC, no target control. Centre = mean and error bar  
962 = standard deviation (s.d.) for 3 technical replicates.

963  
964  
965

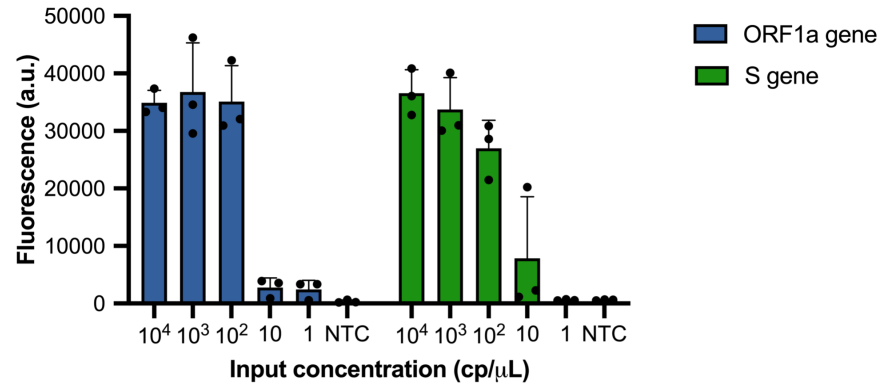

966  
967  
968  
969  
970

**Supplementary Fig. 2 | SHINE assay comparison.** Background-subtracted fluorescence of the ORF1a and S gene SHINE assays using synthetic SARS-CoV-2 RNA after 90 minutes. NTC, no target control. Center = mean and error bars = s.d. for 3 technical replicates.

971

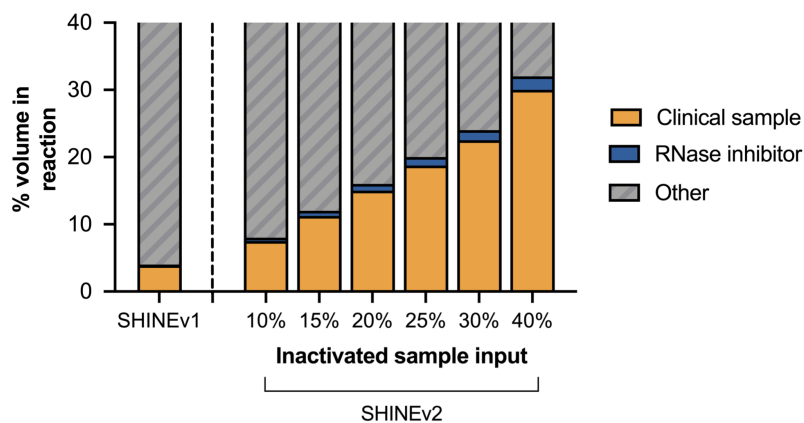

972  
973  
974  
975

**Supplementary Fig. 3 | Inactivated sample input is increased in SHINEv2.** Volume (%) of clinical sample and RNase inhibitors in the final reaction for SHINEv1 and SHINEv2 as a function of inactivated sample input.

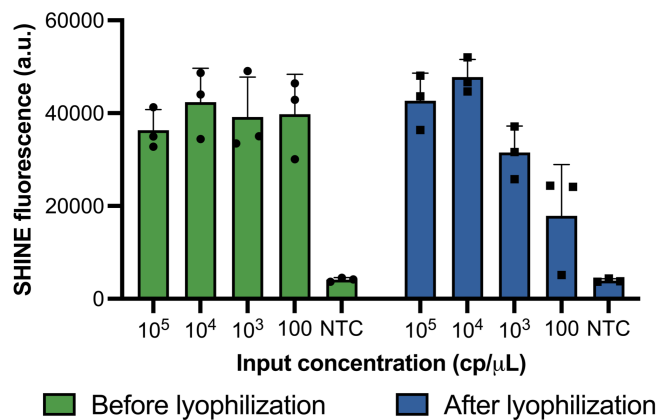

976  
977 **Supplementary Fig. 4 | The activity of SHINE is preserved after lyophilization.** SHINE  
978 fluorescence on synthetic RNA target before and after lyophilization. Fluorescence measured  
979 after 90 minutes. NTC, no target control. Center = mean and error bars = s.d. for 3 technical  
980 replicates.

## Steps in SHINEv2

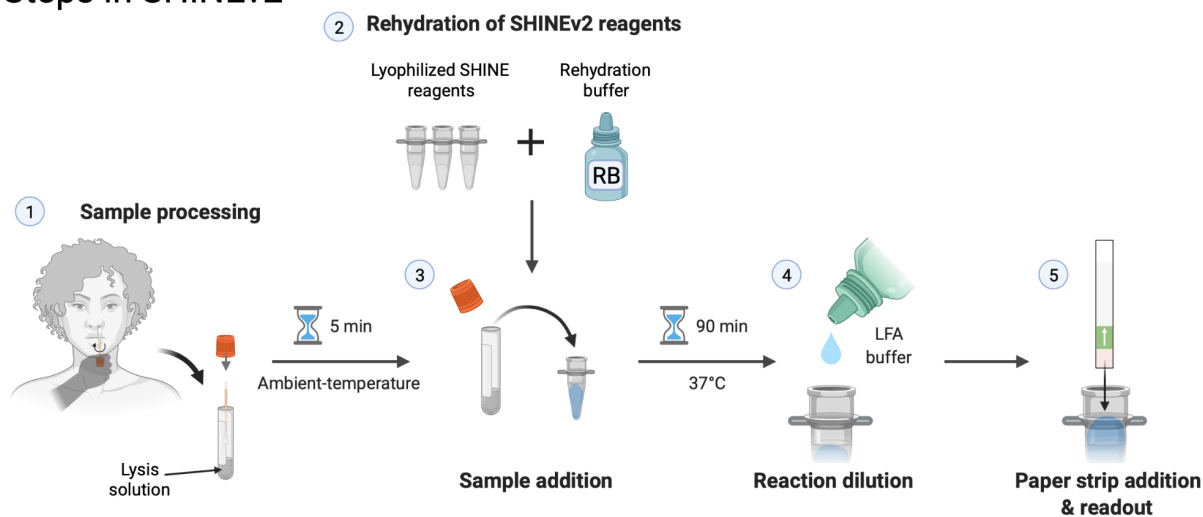

981  
982 **Supplementary Fig. 5 | SHINEv2 requires 5 user manipulations.** Schematic of the SHINEv2  
983 workflow, including sample inactivation, rehydration of pellets, sample addition, reaction dilution  
984 after incubation and result readout.  
985



986  
987

### Broad Institute, USA. T = 0

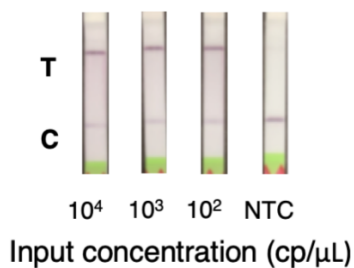

### Broad Institute, USA. T = 6 weeks

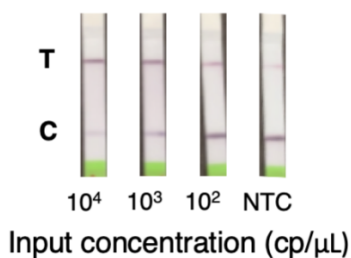

### ACEGID, Nigeria. T = 6 weeks

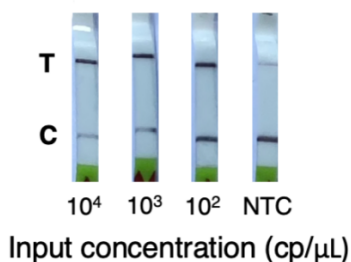

988  
989  
990  
991  
992  
993

**Supplementary Fig. 6 | SHINEv2 can be transported overseas and is stable for at least 6 weeks.** Lateral-flow detection of full-genome synthetic RNA standards in lysis solution-treated UTM using SHINEv2, before and after transportation. Incubated for 90 minutes. C = control band; T = test band; NTC = no target control.

**Target concentration: 500 cp/ $\mu$ L**

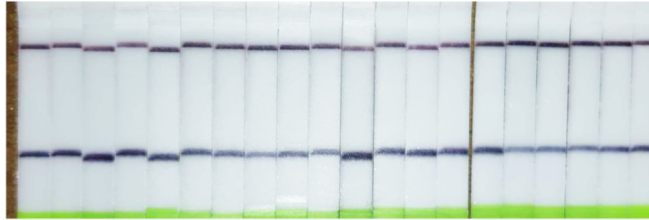

**Target concentration: 100 cp/ $\mu$ L**

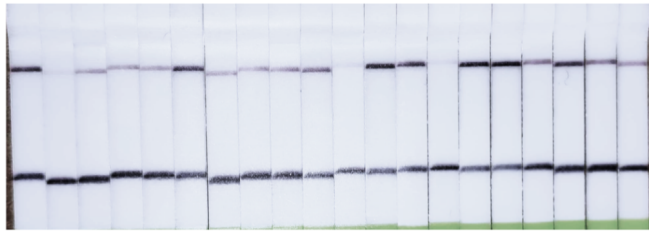

**Target concentration: 50 cp/ $\mu$ L**

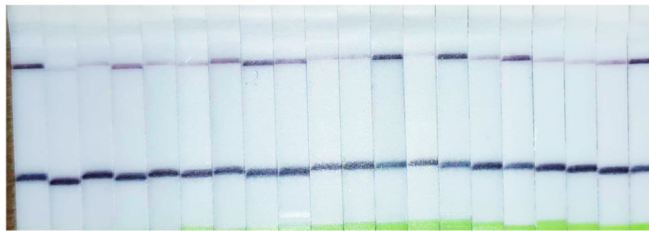

994  
995  
996  
997  
998

**Supplementary Fig. 7 | SHINEv2 has an analytical sensitivity of 200cp/ $\mu$ L.** Determination of analytical limit of detection with 20 replicates of SHINEv2 at different concentrations of SARS-CoV-2 RNA from lysis solution-treated contrived samples. Incubated for 90 minutes. Results for 200cp/ $\mu$ L sample input shown in Fig. 1i.

999

|               |     |     |     |     |     |     |     |     |     |     |     |     |     |     |     |     |
|---------------|-----|-----|-----|-----|-----|-----|-----|-----|-----|-----|-----|-----|-----|-----|-----|-----|
| <b>Sample</b> | S1  | S2  | S3  | S4  | S5  | S6  | S7  | S8  | S9  | S10 | S11 | S12 | S13 | S14 | S15 | S16 |
| <b>Test</b>   |     |     |     |     |     |     |     |     |     |     |     |     |     |     |     |     |
| <b>Sample</b> | S17 | S18 | S19 | S20 | S21 | S22 | S23 | S24 | S25 | S26 | S27 | S28 | S29 | S30 | S31 | S32 |
| <b>Test</b>   |     |     |     |     |     |     |     |     |     |     |     |     |     |     |     |     |
| <b>Sample</b> | S33 | S34 | S35 | S36 | S37 | S38 | S39 | S40 | S41 | S42 | S43 | S44 | S45 | S46 | S47 | S48 |
| <b>Test</b>   |     |     |     |     |     |     |     |     |     |     |     |     |     |     |     |     |
| <b>Sample</b> | S49 | S50 | S51 | S52 | S53 | S54 | S55 | S56 | S57 | S58 | S59 | S60 | S61 | S62 | S63 | S64 |
| <b>Test</b>   |     |     |     |     |     |     |     |     |     |     |     |     |     |     |     |     |
| <b>Sample</b> | S65 | S66 | S67 | S68 | S69 | S70 | S71 | S72 | S73 | S74 | S75 | S76 | S77 | S78 | S79 | S80 |
| <b>Test</b>   |     |     |     |     |     |     |     |     |     |     |     |     |     |     |     |     |
| <b>Sample</b> | S81 | S82 | S83 | S84 | S85 | S86 | S87 | S88 | S89 | S90 | S91 | S92 | S93 | S94 | S95 | S96 |
| <b>Test</b>   |     |     |     |     |     |     |     |     |     |     |     |     |     |     |     |     |

1000  
1001  
1002  
1003  
1004

**Supplementary Fig. 8 | SHINEv2 results on clinical samples.** Images of positive and negative test results with SHINEv2 on unextracted nasopharyngeal (NP) swab samples. Samples were incubated for 90 minutes at 37°C.

|               |                                                                                     |                                                                                     |                                                                                     |                                                                                     |                                                                                     |                                                                                     |                                                                                      |                                                                                       |                                                                                       |                                                                                       |
|---------------|-------------------------------------------------------------------------------------|-------------------------------------------------------------------------------------|-------------------------------------------------------------------------------------|-------------------------------------------------------------------------------------|-------------------------------------------------------------------------------------|-------------------------------------------------------------------------------------|--------------------------------------------------------------------------------------|---------------------------------------------------------------------------------------|---------------------------------------------------------------------------------------|---------------------------------------------------------------------------------------|
| <b>Sample</b> | S1                                                                                  | S2                                                                                  | S3                                                                                  | S4                                                                                  | S5                                                                                  | S6                                                                                  | S7                                                                                   | S8                                                                                    | S9                                                                                    | S10                                                                                   |
| <b>Test</b>   |    |    |    |    |    |    |    |    |    |    |
| <b>Sample</b> | S11                                                                                 | S12                                                                                 | S13                                                                                 | S14                                                                                 | S15                                                                                 | S16                                                                                 | S17                                                                                  | S18                                                                                   | S19                                                                                   | S20                                                                                   |
| <b>Test</b>   |    |    |    |    |    |    |    |    |    |    |
| <b>Sample</b> | S21                                                                                 | S22                                                                                 | S23                                                                                 | S24                                                                                 | S25                                                                                 | S26                                                                                 | S27                                                                                  | S28                                                                                   | S29                                                                                   | S30                                                                                   |
| <b>Test</b>   |    |    |    |    |    |    |    |    |    |    |
| <b>Sample</b> | S31                                                                                 | S32                                                                                 | S33                                                                                 | S34                                                                                 | S35                                                                                 | S36                                                                                 | S37                                                                                  | S38                                                                                   | S39                                                                                   | S40                                                                                   |
| <b>Test</b>   |    |    |    |    |    |    |    |    |    |    |
| <b>Sample</b> | S41                                                                                 | S42                                                                                 | S43                                                                                 | S44                                                                                 | S45                                                                                 | S46                                                                                 | S47                                                                                  | S48                                                                                   | S49                                                                                   | S50                                                                                   |
| <b>Test</b>   |    |    |    |    |    |    |    |    |    |    |
| <b>Sample</b> | S51                                                                                 | S52                                                                                 | S53                                                                                 | S54                                                                                 | S55                                                                                 | S56                                                                                 | S57                                                                                  | S58                                                                                   | S59                                                                                   | S60                                                                                   |
| <b>Test</b>   |   |   |   |   |   |   |   |   |   |   |
| <b>Sample</b> | S61                                                                                 | S62                                                                                 | S63                                                                                 | S64                                                                                 | S65                                                                                 | S66                                                                                 | S67                                                                                  | S68                                                                                   | S69                                                                                   | S70                                                                                   |
| <b>Test</b>   |  |  |  |  |  |  |  |  |  |  |
| <b>Sample</b> | S71                                                                                 | S72                                                                                 | S73                                                                                 | S74                                                                                 | S75                                                                                 | S76                                                                                 | S77                                                                                  | S78                                                                                   | S79                                                                                   | S80                                                                                   |
| <b>Test</b>   |  |  |  |  |  |  |  |  |  |  |
| <b>Sample</b> | S81                                                                                 | S82                                                                                 | S83                                                                                 | S84                                                                                 | S85                                                                                 | S86                                                                                 | S87                                                                                  | S88                                                                                   | S89                                                                                   | S90                                                                                   |
| <b>Test</b>   |  |  |  |  |  |  |  |  |  |  |
| <b>Sample</b> | S91                                                                                 | S92                                                                                 | S93                                                                                 | S94                                                                                 | S95                                                                                 | S96                                                                                 |                                                                                      |                                                                                       |                                                                                       |                                                                                       |
| <b>Test</b>   |  |  |  |  |  |  |                                                                                      |                                                                                       |                                                                                       |                                                                                       |

1005  
1006  
1007  
1008  
1009

**Supplementary Fig. 9 | BinaxNow results on clinical samples.** Images of positive and negative test results with BinaxNow on unextracted NP swab samples.

1010

|               |                                                                                     |                                                                                     |                                                                                     |                                                                                     |                                                                                     |                                                                                     |                                                                                     |                                                                                     |                                                                                      |                                                                                       |                                                                                       |                                                                                       |
|---------------|-------------------------------------------------------------------------------------|-------------------------------------------------------------------------------------|-------------------------------------------------------------------------------------|-------------------------------------------------------------------------------------|-------------------------------------------------------------------------------------|-------------------------------------------------------------------------------------|-------------------------------------------------------------------------------------|-------------------------------------------------------------------------------------|--------------------------------------------------------------------------------------|---------------------------------------------------------------------------------------|---------------------------------------------------------------------------------------|---------------------------------------------------------------------------------------|
| <b>Sample</b> | S1                                                                                  | S2                                                                                  | S3                                                                                  | S4                                                                                  | S5                                                                                  | S6                                                                                  | S7                                                                                  | S8                                                                                  | S9                                                                                   | S10                                                                                   | S11                                                                                   | S12                                                                                   |
| <b>Test</b>   | 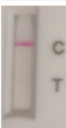   |    |    |    |    |    |    |    |    |    |    |    |
| <b>Sample</b> | S13                                                                                 | S14                                                                                 | S15                                                                                 | S16                                                                                 | S17                                                                                 | S18                                                                                 | S19                                                                                 | S20                                                                                 | S21                                                                                  | S22                                                                                   | S23                                                                                   | S24                                                                                   |
| <b>Test</b>   |    |    |    |    |    |    |    |    |    |    |    |    |
| <b>Sample</b> | S25                                                                                 | S26                                                                                 | S27                                                                                 | S28                                                                                 | S29                                                                                 | S30                                                                                 | S31                                                                                 | S32                                                                                 | S33                                                                                  | S34                                                                                   | S35                                                                                   | S36                                                                                   |
| <b>Test</b>   |    |    |    |    |    |    |    |    |    |    |    |    |
| <b>Sample</b> | S37                                                                                 | S38                                                                                 | S39                                                                                 | S40                                                                                 | S41                                                                                 | S42                                                                                 | S43                                                                                 | S44                                                                                 | S45                                                                                  | S46                                                                                   | S47                                                                                   | S48                                                                                   |
| <b>Test</b>   |   |   |   |   |   |   |   |   |   |   |   |   |
| <b>Sample</b> | S49                                                                                 | S50                                                                                 | S51                                                                                 | S52                                                                                 | S53                                                                                 | S54                                                                                 | S55                                                                                 | S56                                                                                 | S57                                                                                  | S58                                                                                   | S59                                                                                   | S60                                                                                   |
| <b>Test</b>   |  |  |  |  |  |  |  |  |  |  |  |  |
| <b>Sample</b> | S61                                                                                 | S62                                                                                 | S63                                                                                 | S64                                                                                 | S65                                                                                 | S66                                                                                 | S67                                                                                 | S68                                                                                 | S69                                                                                  | S70                                                                                   | S71                                                                                   | S72                                                                                   |
| <b>Test</b>   |  |  |  |  |  |  |  |  |  |  |  |  |
| <b>Sample</b> | S73                                                                                 | S74                                                                                 | S75                                                                                 | S76                                                                                 | S77                                                                                 | S78                                                                                 | S79                                                                                 | S80                                                                                 | S81                                                                                  | S82                                                                                   | S83                                                                                   | S84                                                                                   |
| <b>Test</b>   |  |  |  |  |  |  |  |  |  |  |  |  |
| <b>Sample</b> | S85                                                                                 | S86                                                                                 | S87                                                                                 | S88                                                                                 | S89                                                                                 | S90                                                                                 | S91                                                                                 | S92                                                                                 | S93                                                                                  | S94                                                                                   | S95                                                                                   | S96                                                                                   |
| <b>Test</b>   |  |  |  |  |  |  |  |  |  |  |  |  |

1011  
1012  
1013

**Supplementary Fig. 10 | CareStart results on clinical samples.** Images of positive and negative test results with CareStart on unextracted nasopharyngeal NP swab samples.



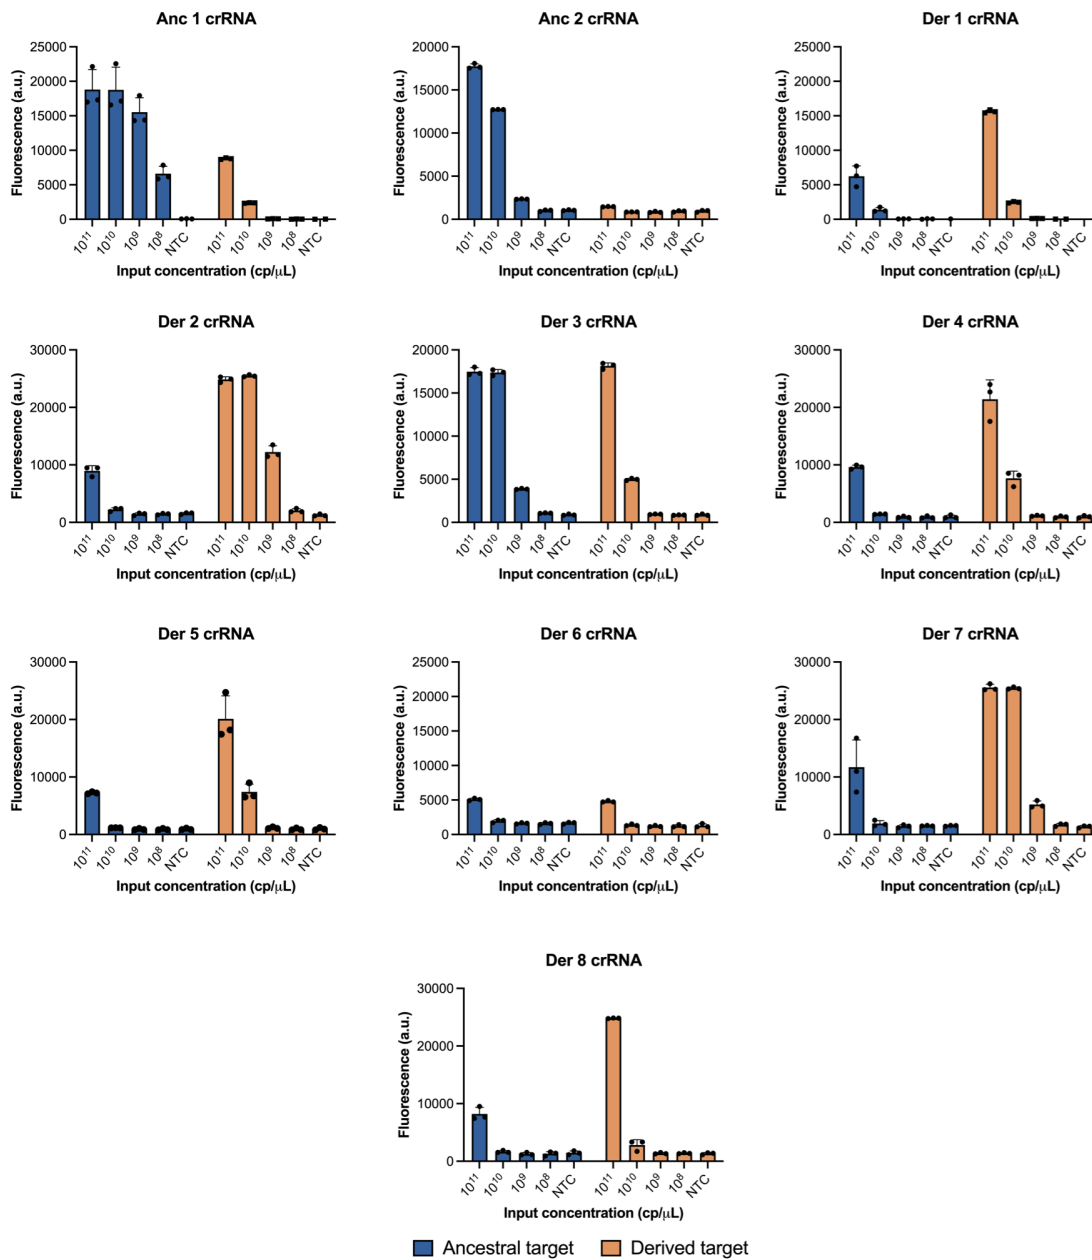

1014  
 1015 **Supplementary Fig. 11 | Selection of ancestral (anc) and derived (der) crRNAs for the S**  
 1016 **gene 69/70 deletion assay.** Cas13a detection of ancestral and derived synthetic RNA targets  
 1017 with different anc and der crRNAs. NTC, no target control. Centre = mean and error bar = standard  
 1018 deviation (s.d.) for 3 technical replicates.  
 1019

1020

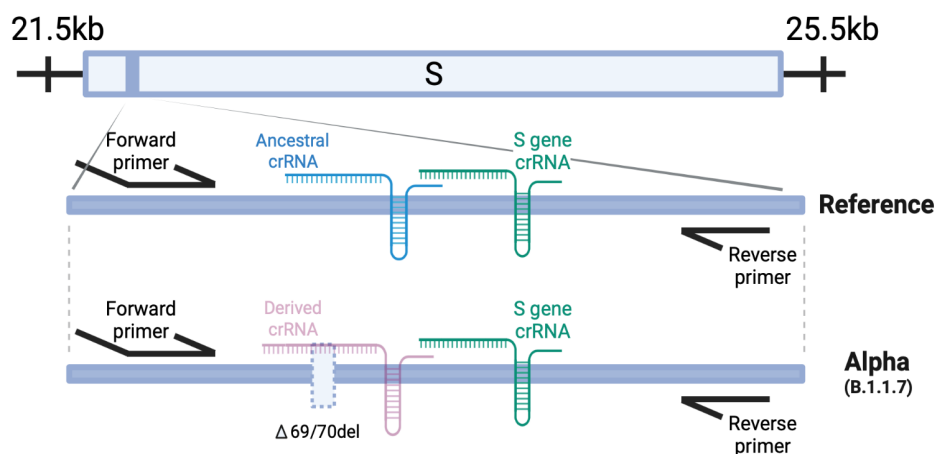

1021  
1022  
1023  
1024  
1025  
1026

**Supplementary Fig. 12 | Location of the SHINEv2 assay for the 69/70 deletion detection.** Schematic of location of the S gene and 69/70 deletion SHINEv2 assays within the S gene of SARS-CoV-2 for the reference strain and Alpha VOC. Dashed rectangle, deletion at amino acid positions 69 and 70 ( $\Delta 69/70\text{del}$ ).

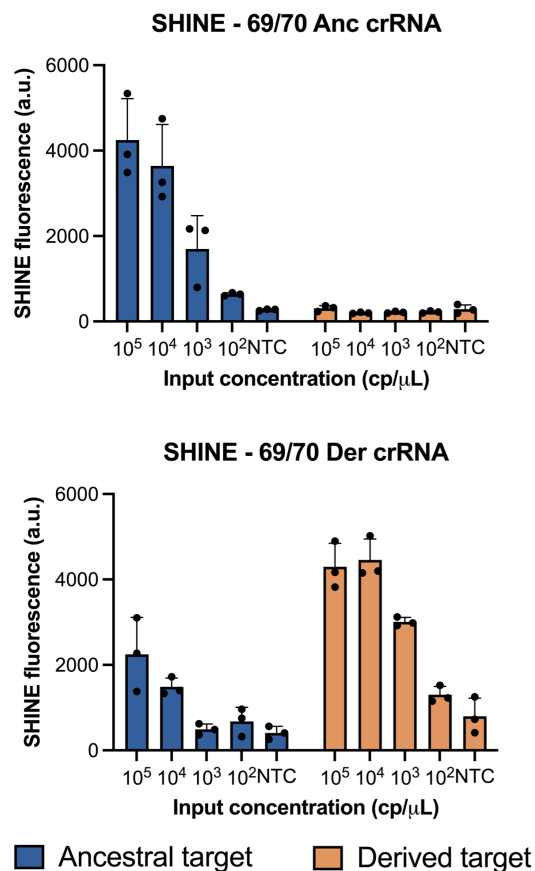

1027  
1028 **Supplementary Fig. 13 | Performance of 69/70 deletion assay on synthetic RNA targets.**  
1029 SHINE fluorescence of the 69/70 ancestral (anc) and derived (der) assays on synthetic SARS-  
1030 CoV-2 RNA targets after 90 minutes. NTC, no target control. Center = mean and error bars = s.d.  
1031 for 3 technical replicates.  
1032

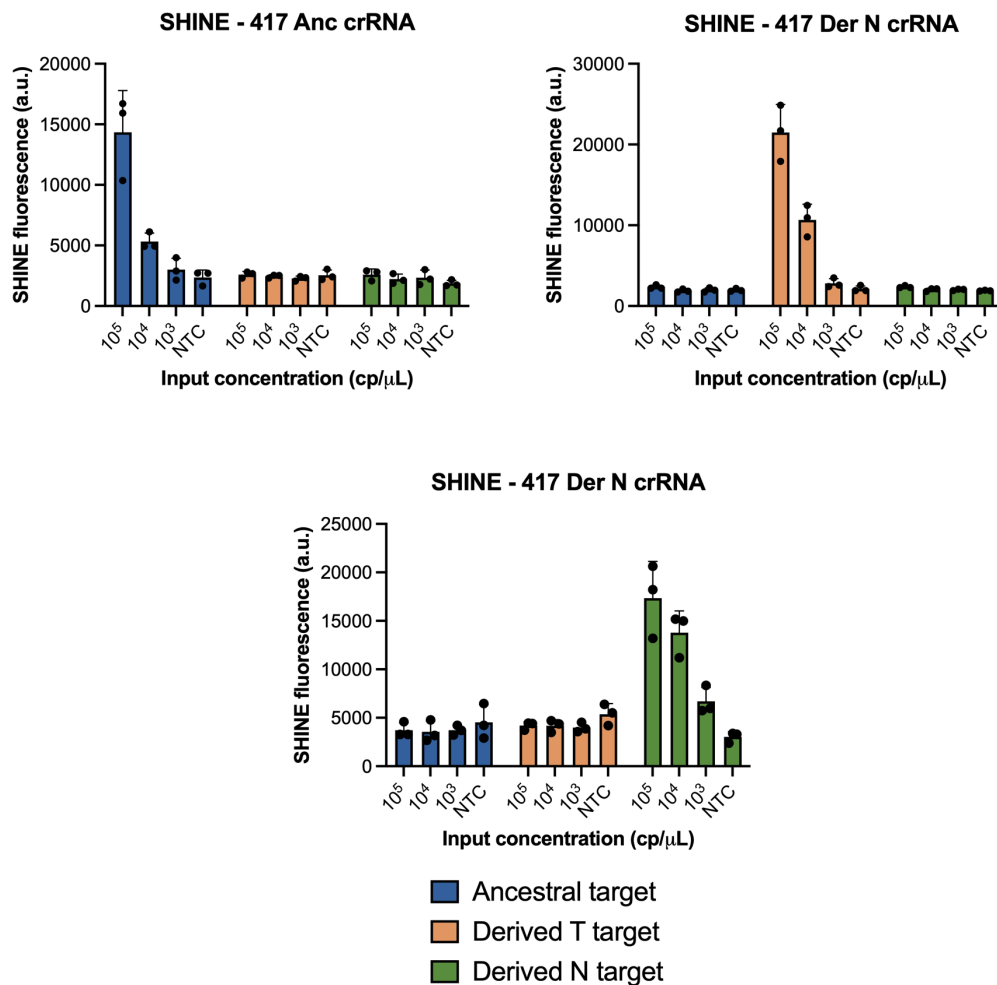

1033  
1034  
1035  
1036  
1037  
1038

**Supplementary Fig. 14 | Performance of 417 SNP detection assay on synthetic RNA targets.** SHINE fluorescence of the 417 ancestral (anc), derived T (der T) and derived N (der N) assays on synthetic SARS-CoV-2 RNA targets after 90 minutes. NTC, no target control. Center = mean and error bars = s.d. for 3 technical replicates.

1039  
1040

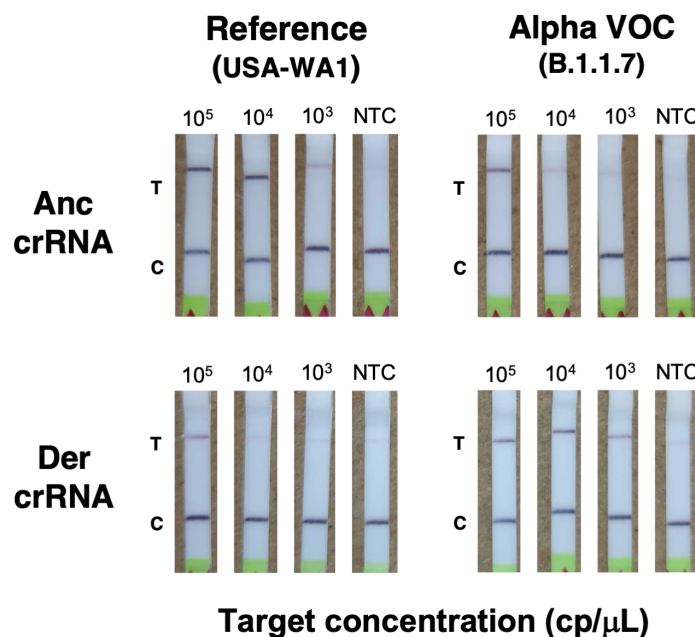

1041  
1042  
1043  
1044  
1045  
1046  
1047

**Supplementary Fig. 15 | Lateral-flow detection of Alpha VOC in contrived clinical samples.** Colorimetric lateral flow based detection of SARS-CoV-2 RNA in contrived clinical samples using the 69/70 SHINEv2 assay. SHINEv2 incubation time: 90 minutes. NTC, no-target control. T, test line; C, control line.



1048

a

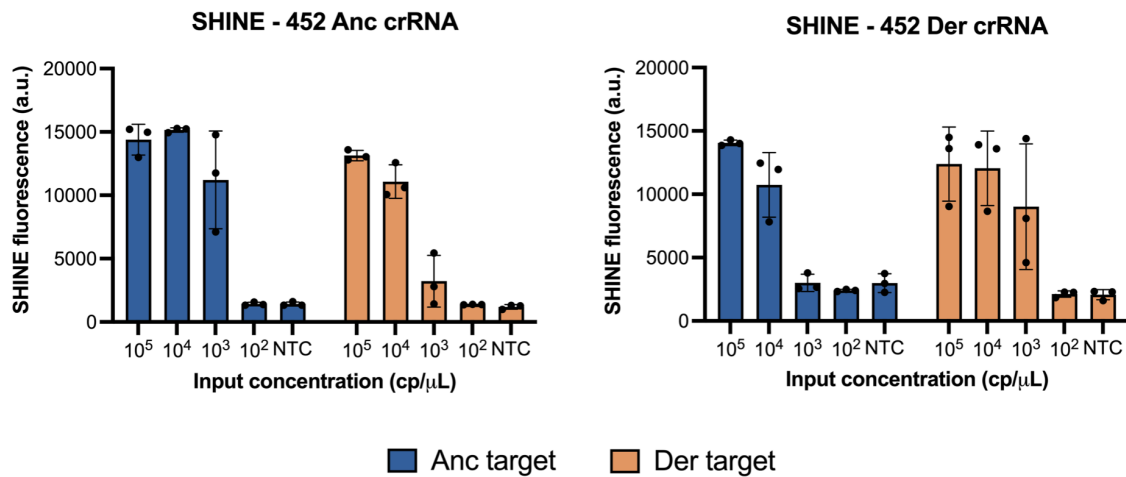

b

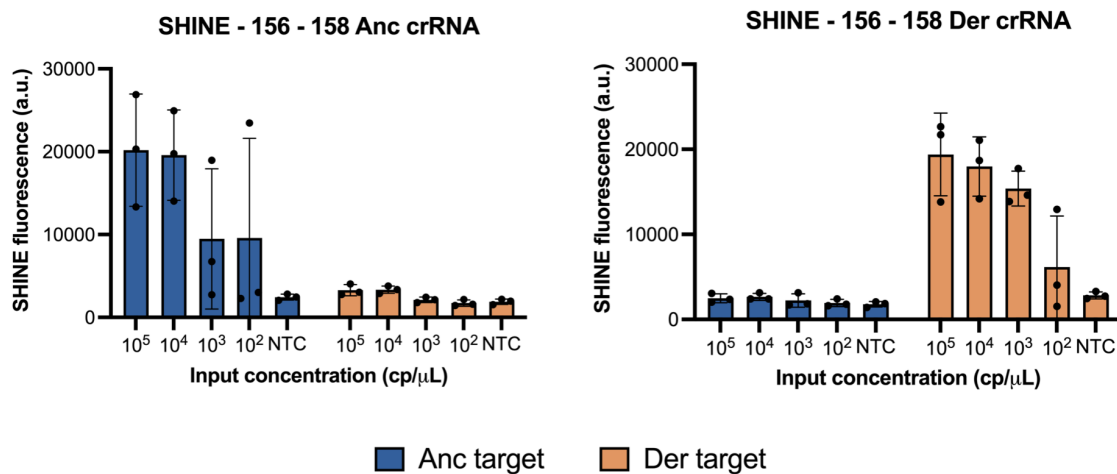

1049  
1050  
1051  
1052  
1053  
1054  
1055

**Supplementary Fig. 16 | Performance of SARS-CoV-2 Delta assays on full genome synthetic RNA standards. a,b.** SHINE fluorescence of the (a) 452 and (b) 156 - 158 ancestral (anc) and derived (der) assays on full genome synthetic RNA standards after 90 minutes. NTC, no target control. Center = mean and error bars = s.d. for 3 technical replicates.

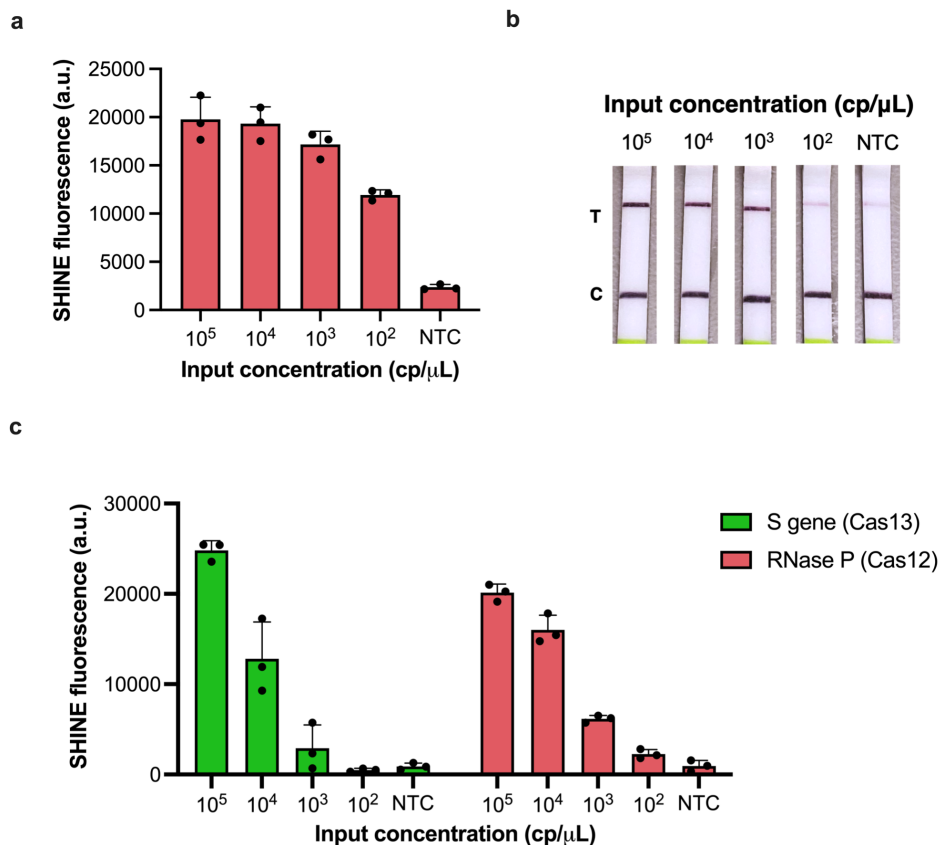

1056  
 1057 **Supplementary Fig. 17 | Development of Cas12-based SHINE assay for RNase P detection.**  
 1058 **a.** SHINE fluorescence of the RNase P assay on synthetic DNA target after 90 minutes; NTC =  
 1059 no target control **b.** Lateral-flow detection of synthetic DNA target using Cas12-based SHINE  
 1060 assay, after 90 minute incubation; NTC = no target control C = control band; T = test band **c.**  
 1061 SHINE fluorescence of the duplex SARS-CoV-2 S gene and RNase P assays on synthetic nucleic  
 1062 acid targets after 90 minutes. NTC = no target control. For **a** and **c**, center = mean and error  
 1063 bars = s.d. for 3 technical replicates.  
 1064

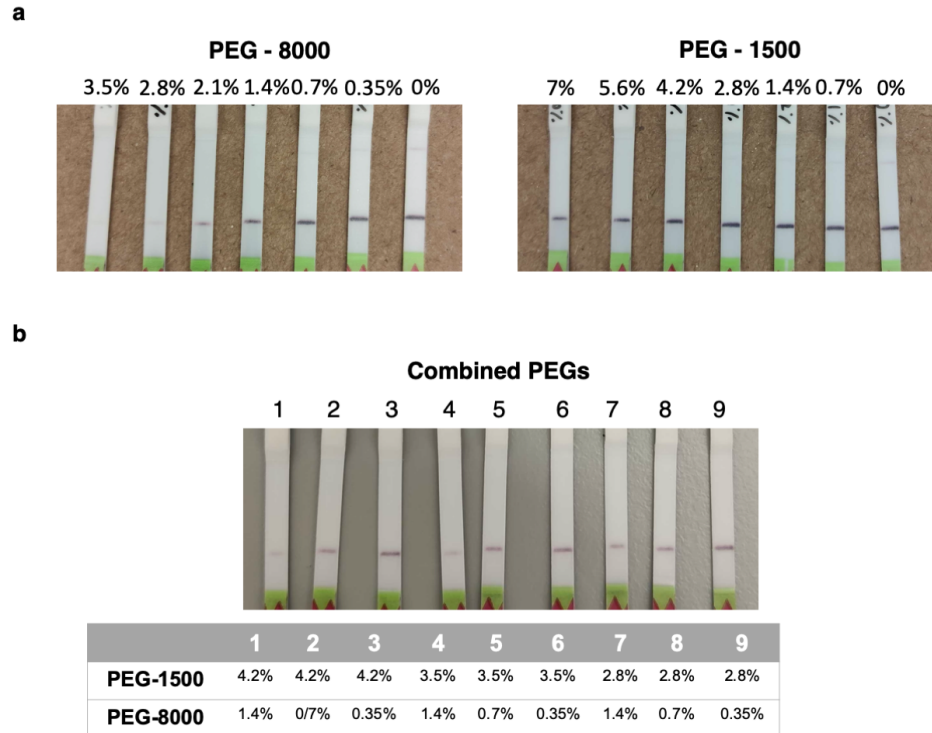

1065  
1066  
1067  
1068  
1069

**Supplementary Fig. 18 | Effect of PEG on flow through the strip.** **a** and **b**, images of lateral flow strips from SHINEv2 reactions with PEGs of different molecular weights and concentrations (**a**) separately and (**b**) in combination, in the absence of an RNA target.

1070  
1071

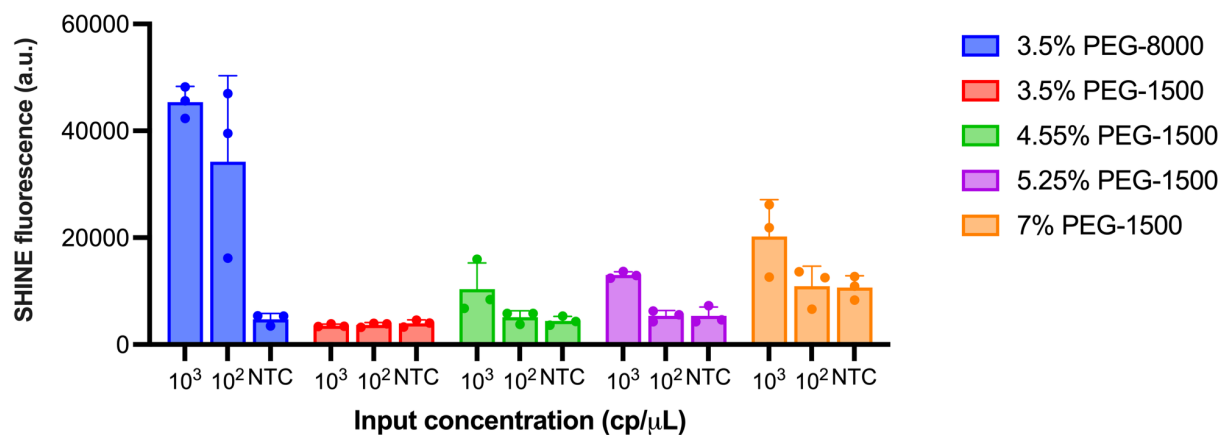

1072  
1073  
1074  
1075  
1076  
1077

**Supplementary Fig. 19 | Effect of PEG concentration on SHINE performance.** SHINE fluorescence on synthetic SARS-CoV-2 RNA targets (S gene) relative to PEG molecular weight and concentration. Reactions incubated for 90 minutes. NTC, no target control. Center = mean and error bars = s.d. for 3 technical replicates.

1078  
1079

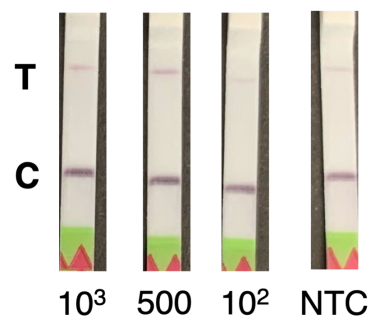

Input concentration (cp/μL)

1080  
1081 **Supplementary Fig. 20 | Performance of equipment-free SHINEv2 at room temperature.**  
1082 Lateral flow detection of full genome synthetic RNA standards in lysis solution-treated UTM using  
1083 SHINEv2, after a 90 minute incubation at 25°C. C = control band; T = test band; NTC = no target  
1084 control.  
1085

1086

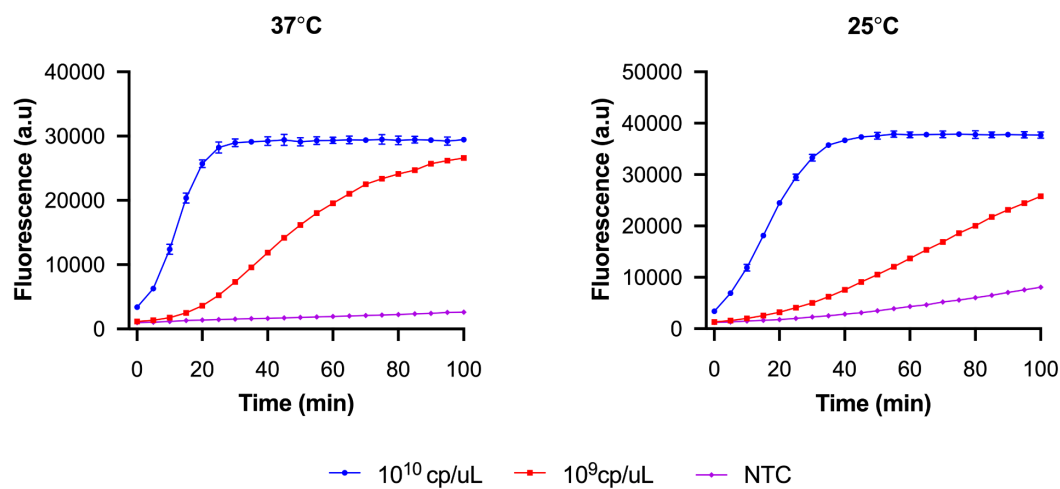

1087  
1088  
1089  
1090  
1091  
1092

**Supplementary Fig. 21 | Temperature has a limited effect on Cas13-based detection.** Cas13-detection of synthetic RNA target (S gene) at 37°C and 25°C. NTC, non target control. Centre = mean and error bar = standard deviation (s.d.) for 3 technical replicates.



1093 **Supplementary Table 1 | Patient sample information.**

1094 Samples S1 - S96 were used without extraction, whereas RNA was extracted from samples E1 -  
 1095 E20 before use. See *methods* for details. UTM, universal viral transport medium; VTM, viral  
 1096 transport medium; RP, RNase P.

| SHINEv2 sample ID | Sample matrix | N1 viral titer (copies/ $\mu$ L) | N1 Ct | N2 Ct | RP Ct | Figures                                |
|-------------------|---------------|----------------------------------|-------|-------|-------|----------------------------------------|
| S1                | VTM           | 883                              | 27.8  | 29.3  | 29.7  | Supplementary Fig. 8-10                |
| S2                | VTM           | 1078                             | 27.5  | 29.0  | 26.9  | Supplementary Fig. 8-10                |
| S3                | VTM           | 7                                | 35.6  | 37.8  | 31.5  | Supplementary Fig. 8-10                |
| S4                | VTM           | 194575                           | 19.4  | 20.3  | 28.9  | Supplementary Fig. 8-10                |
| S5                | VTM           | 107                              | 31.0  | 32.7  | 31.9  | Supplementary Fig. 8-10                |
| S6                | VTM           | 109                              | 31.0  | 33.0  | 30.0  | Supplementary Fig. 8-10                |
| S7                | VTM           | 328                              | 29.0  | 31.1  | 24.6  | Supplementary Fig. 8-10                |
| S8                | VTM           | 34                               | 33.0  | 35.1  | 29.5  | Supplementary Fig. 8-10                |
| S9                | VTM           | 778                              | 28.0  | 29.8  | 30.0  | Supplementary Fig. 8-10                |
| S10               | VTM           | 4739                             | 25.2  | 26.9  | 29.3  | Supplementary Fig. 8-10                |
| S11               | VTM           | 33                               | 33.0  | 35.6  | 29.4  | Supplementary Fig. 8-10                |
| S12               | VTM           | 599754                           | 17.7  | 18.6  | 29.5  | Fig. 2b and<br>Supplementary Fig. 8-10 |
| S13               | VTM           | 271                              | 29.4  | 31.6  | 29.5  | Supplementary Fig. 8-10                |
| S14               | VTM           | 931                              | 27.7  | 29.2  | 29.4  | Supplementary Fig. 8-10                |
| S15               | VTM           | 540                              | 28.6  | 30.8  | 29.4  | Supplementary Fig. 8-10                |
| S16               | VTM           | 3281                             | 25.7  | 27.9  | 29.1  | Supplementary Fig. 8-10                |
| S17               | VTM           | 739                              | 28.1  | 29.8  | 24.6  | Fig. 2b and<br>Supplementary Fig. 8-10 |
| S18               | Saline        | -                                | -     | -     | 29.7  | Supplementary Fig. 8-10                |
| S19               | Saline        | 232                              | 29.6  | 32.2  | 28.2  | Supplementary Fig. 8-10                |
| S20               | Saline        | -                                | -     | -     | 29.0  | Supplementary Fig. 8-10                |
| S21               | Saline        | 1                                | 37.7  | -     | 26.4  | Supplementary Fig. 8-10                |
| S22               | Saline        | 3                                | 37.0  | 38.5  | 27.3  | Supplementary Fig. 8-10                |
| S23               | VTM           | 188                              | 29.9  | 32.1  | 30.3  | Supplementary Fig. 8-10                |
| S24               | UTM           | 3739                             | 25.5  | 27.8  | 28.9  | Supplementary Fig. 8-10                |
| S25               | UTM           | -                                | -     | -     | 32.3  | Supplementary Fig. 8-10                |
| S26               | UTM           | -                                | -     | -     | 29.8  | Supplementary Fig. 8-10                |
| S27               | UTM           | -                                | -     | -     | 30.6  | Supplementary Fig. 8-10                |

|     |     |         |      |      |      |                                        |
|-----|-----|---------|------|------|------|----------------------------------------|
| S28 | UTM | -       | -    | -    | 28.8 | Supplementary Fig. 8-10                |
| S29 | UTM | -       | -    | -    | 30.2 | Supplementary Fig. 8-10                |
| S30 | UTM | -       | -    | -    | 29.8 | Supplementary Fig. 8-10                |
| S31 | UTM | -       | -    | -    | 31.1 | Supplementary Fig. 8-10                |
| S32 | UTM | -       | -    | -    | 34.1 | Supplementary Fig. 8-10                |
| S33 | UTM | -       | -    | -    | 30.5 | Supplementary Fig. 8-10                |
| S34 | UTM | -       | -    | -    | 31.7 | Supplementary Fig. 8-10                |
| S35 | UTM | -       | -    | -    | 28.4 | Fig. 2b and<br>Supplementary Fig. 8-10 |
| S36 | UTM | -       | -    | -    | 30.1 | Supplementary Fig. 8-10                |
| S37 | UTM | -       | -    | -    | 27.4 | Supplementary Fig. 8-10                |
| S38 | UTM | -       | -    | -    | 28.8 | Supplementary Fig. 8-10                |
| S39 | UTM | -       | -    | -    | 29.6 | Supplementary Fig. 8-10                |
| S40 | UTM | -       | -    | -    | 28.0 | Supplementary Fig. 8-10                |
| S41 | UTM | -       | -    | -    | 30.6 | Supplementary Fig. 8-10                |
| S42 | UTM | -       | -    | -    | 29.7 | Supplementary Fig. 8-10                |
| S43 | UTM | -       | -    | -    | 29.2 | Supplementary Fig. 8-10                |
| S44 | UTM | -       | -    | -    | 31.0 | Supplementary Fig. 8-10                |
| S45 | UTM | -       | -    | -    | 30.0 | Supplementary Fig. 8-10                |
| S46 | UTM | -       | -    | -    | 30.8 | Supplementary Fig. 8-10                |
| S47 | UTM | -       | -    | -    | 29.1 | Supplementary Fig. 8-10                |
| S48 | UTM | -       | -    | -    | 27.7 | Supplementary Fig. 8-10                |
| S49 | UTM | 3       | 36.8 | 38.7 | 30.0 | Supplementary Fig. 8-10                |
| S50 | VTM | -       | -    | -    | 27.7 | Supplementary Fig. 8-10                |
| S51 | VTM | 653     | 28.0 | 30.0 | 26.1 | Supplementary Fig. 8-10                |
| S52 | VTM | 193     | 29.8 | 31.8 | 31.3 | Supplementary Fig. 8-10                |
| S53 | VTM | 31094   | 22.0 | 23.4 | 31.9 | Supplementary Fig. 8-10                |
| S54 | VTM | 1130    | 27.1 | 29.4 | 29.6 | Supplementary Fig. 8-10                |
| S55 | VTM | 527     | 28.3 | 30.7 | 31.8 | Supplementary Fig. 8-10                |
| S56 | VTM | 2323088 | 15.4 | 16.6 | 28.6 | Supplementary Fig. 8-10                |
| S57 | VTM | -       | -    | 37.7 | 32.2 | Supplementary Fig. 8-10                |
| S58 | VTM | 129     | 30.2 | 33.1 | 31.6 | Supplementary Fig. 8-10                |
| S59 | VTM | -       | -    | 38.6 | 30.6 | Supplementary Fig. 8-10                |
| S60 | VTM | 34      | 32.6 | 35.0 | 30.3 | Fig. 2b and                            |

|     |     |         |      |      |      |                         |
|-----|-----|---------|------|------|------|-------------------------|
|     |     |         |      |      |      | Supplementary Fig. 8-10 |
| S61 | VTM | 82      | 31.2 | 33.4 | 31.3 | Supplementary Fig. 8-10 |
| S62 | VTM | 10      | 34.5 | 36.7 | 32.0 | Supplementary Fig. 8-10 |
| S63 | VTM | 1224    | 27.0 | 29.0 | 29.1 | Supplementary Fig. 8-10 |
| S64 | VTM | 4       | 36.0 | 38.3 | 28.2 | Supplementary Fig. 8-10 |
| S65 | UTM | -       | -    | -    | 29.9 | Supplementary Fig. 8-10 |
| S66 | UTM | -       | -    | -    | 30.2 | Supplementary Fig. 8-10 |
| S67 | UTM | -       | -    | -    | 27.8 | Supplementary Fig. 8-10 |
| S68 | UTM | 2       | 37.2 | 39.3 | 31.4 | Supplementary Fig. 8-10 |
| S69 | UTM | 4       | 35.9 | 38.5 | 26.4 | Supplementary Fig. 8-10 |
| S70 | UTM | 3       | 36.0 | 38.6 | 29.6 | Supplementary Fig. 8-10 |
| S71 | VTM | 3706009 | 14.7 | 15.8 | 27.3 | Supplementary Fig. 8-10 |
| S72 | VTM | 3118    | 25.6 | 27.5 | 29.7 | Supplementary Fig. 8-10 |
| S73 | VTM | 13588   | 23.1 | 24.4 | 28.8 | Supplementary Fig. 8-10 |
| S74 | VTM | 7       | 34.9 | 37.0 | 25.8 | Supplementary Fig. 8-10 |
| S75 | VTM | 1471    | 26.5 | 27.9 | 27.8 | Supplementary Fig. 8-10 |
| S76 | VTM | 3       | 36.5 | 38.2 | 30.3 | Supplementary Fig. 8-10 |
| S77 | VTM | 12      | 34.4 | 37.3 | 25.8 | Supplementary Fig. 8-10 |
| S78 | VTM | 9       | 34.6 | 38.0 | 29.5 | Supplementary Fig. 8-10 |
| S79 | VTM | 2925    | 25.5 | 27.2 | 28.1 | Supplementary Fig. 8-10 |
| S80 | VTM | 345     | 28.8 | 30.2 | 32.1 | Supplementary Fig. 8-10 |
| S81 | VTM | 5       | 35.6 | 37.5 | 28.3 | Supplementary Fig. 8-10 |
| S82 | VTM | 20694   | 22.4 | 23.4 | 29.5 | Supplementary Fig. 8-10 |
| S83 | VTM | 46      | 32.0 | 33.8 | 30.1 | Supplementary Fig. 8-10 |
| S84 | VTM | 14      | 33.8 | 36.6 | 29.1 | Supplementary Fig. 8-10 |
| S85 | VTM | 187051  | 18.9 | 19.9 | 26.1 | Supplementary Fig. 8-10 |
| S86 | VTM | 21      | 33.3 | 35.1 | 28.8 | Supplementary Fig. 8-10 |
| S87 | VTM | 13      | 34.2 | 36.6 | 30.8 | Supplementary Fig. 8-10 |
| S88 | VTM | 412032  | 17.7 | 18.8 | 27.4 | Supplementary Fig. 8-10 |
| S89 | VTM | 10      | 34.4 | 37.7 | 29.4 | Supplementary Fig. 8-10 |
| S90 | VTM | 172     | 30.0 | 32.3 | 28.1 | Supplementary Fig. 8-10 |
| S91 | VTM | 23      | 33.4 | 35.8 | 26.4 | Supplementary Fig. 8-10 |
| S92 | VTM | 386     | 28.7 | 29.7 | 30.9 | Supplementary Fig. 8-10 |
| S93 | VTM | 3907    | 25.0 | 26.3 | 28.9 | Supplementary Fig. 8-10 |

|     |         |       |      |      |      |                         |
|-----|---------|-------|------|------|------|-------------------------|
| S94 | VTM     | 16    | 33.8 | 35.0 | 31.8 | Supplementary Fig. 8-10 |
| S95 | VTM     | -     | -    | -    | 30.3 | Supplementary Fig. 8-10 |
| S96 | VTM     | 3     | 36.9 | 38.2 | 32.6 | Supplementary Fig. 8-10 |
| E1  | VTM     | 65806 | 20.9 | 20.0 | 28.2 | Fig. 3e                 |
| E2  | UTM     | 23588 | 22.1 | 23.2 | 27.9 | Fig. 3e                 |
| E3  | VTM     | 1213  | 26.8 | 25.8 | 30.6 | Fig. 3e                 |
| E4  | VTM     | 3237  | 25.5 | 26.8 | 31.2 | Fig. 3e                 |
| E5  | VTM     | 753   | 27.3 | 29.3 | 32.1 | Fig. 3e                 |
| E6  | VTM     | 738   | 27.6 | 27.2 | 29.8 | Fig. 3e                 |
| E7  | Unknown | 7804  | 24.1 | 24.2 | 31.2 | Fig. 3e                 |
| E8  | Unknown | 4495  | 24.9 | 24.2 | 29.1 | Fig. 3e                 |
| E9  | Unknown | 291   | 29.0 | 28.6 | 30.0 | Fig. 3e                 |
| E10 | Unknown | 12954 | 23.3 | 23.3 | 33.5 | Fig. 3e                 |
| E11 | UTM     | -     | -    | -    | 32.0 | Fig. 3e                 |
| E12 | UTM     | -     | -    | -    | 30.2 | Fig. 3e                 |
| E13 | UTM     | -     | -    | -    | 30.7 | Fig. 3e                 |
| E14 | UTM     | -     | -    | -    | 29.9 | Fig. 3e                 |
| E15 | UTM     | -     | -    | -    | 30.4 | Fig. 3e                 |
| E16 | UTM     | -     | -    | -    | 29.5 | Fig. 3e                 |
| E17 | UTM     | -     | -    | -    | 30.2 | Fig. 3e                 |
| E18 | UTM     | -     | -    | -    | 33.8 | Fig. 3e                 |
| E19 | UTM     | -     | -    | -    | 30.6 | Fig. 3e                 |
| E20 | UTM     | -     | -    | -    | 31.1 | Fig. 3e                 |

1097

1098

1099

1100

1101

1102

1103

1104 **Supplementary Table 2 | Oligonucleotides used in this study.**

| Name                     | Oligo type | Sequence                                                                  | Gene - Assay |
|--------------------------|------------|---------------------------------------------------------------------------|--------------|
| ORF1a crRNA              | crRNA      | GAUUUAGACUACCCCAAAAACGAAGGGGACU<br>AAAACCCUCUUCUUCAGGUUGAAGAGCAGCAG<br>AA | ORF1ab       |
| S gene crRNA - 1         | crRNA      | GAUUUAGACUACCCCAAAAACGAAGGGGACU<br>AAAACUGGUAGGACAGGGUUAUCAAAACCUCU<br>UA | S            |
| S gene crRNA - 2         | crRNA      | GAUUUAGACUACCCCAAAAACGAAGGGGACU<br>AAAACACAGGUUAUCAAAACCUCUAGUACC<br>AU   | S            |
| S gene crRNA - 3         | crRNA      | GAUUUAGACUACCCCAAAAACGAAGGGGACU<br>AAAACACCAUUUAAUGAUGGUGUUUUAUUUUG<br>CU | S            |
| S - 69/70 anc<br>crRNA 1 | crRNA      | GAUUUAGACUACCCCAAAAACGAAGGGGACU<br>AAAACACCAUUGGUCCAGAGACAUGUAUAG<br>CA   | S - 69/70    |
| S - 69/70 anc<br>crRNA 2 | crRNA      | GAUUUAGACUACCCCAAAAACGAAGGGGACU<br>AAAACUCCCAGAGACAUGUAUAGCAUGGAAC<br>CA  | S - 69/70    |
| S - 69/70 der<br>crRNA 1 | crRNA      | GAUUUAGACUACCCCAAAAACGAAGGGGACU<br>AAAACCUUAGUACCAUUGGUCCAGAUUAG<br>CA    | S - 69/70    |
| S - 69/70 der<br>crRNA 2 | crRNA      | GAUUUAGACUACCCCAAAAACGAAGGGGACU<br>AAAACUCCCAGAUUAGCAUGGAACCAAGUA<br>C    | S - 69/70    |
| S - 69/70 der<br>crRNA 3 | crRNA      | GAUUUAGACUACCCCAAAAACGAAGGGGACU<br>AAAACCAGAUUAGCAUGGAACCAAGUAACAU<br>U   | S - 69/70    |
| S - 69/70 der<br>crRNA 4 | crRNA      | GAUUUAGACUACCCCAAAAACGAAGGGGACU<br>AAAACGGUCCCAGAUUAGCAUGGAACCAAG<br>UA   | S - 69/70    |
| S - 69/70 der<br>crRNA 5 | crRNA      | GAUUUAGACUACCCCAAAAACGAAGGGGACU<br>AAAACUUGGUCCCAGAUUAGCAUGGAACCA<br>AG   | S - 69/70    |
| S - 69/70 der<br>crRNA 6 | crRNA      | GAUUUAGACUACCCCAAAAACGAAGGGGACU<br>AAAACCAUUGGUCCCAGAUUAGCAUGGAAC<br>CA   | S - 69/70    |
| S - 69/70 der            | crRNA      | GAUUUAGACUACCCCAAAAACGAAGGGGACU                                           | S - 69/70    |

|                        |              |                                                                   |               |
|------------------------|--------------|-------------------------------------------------------------------|---------------|
| crRNA 7                |              | AAAACACCAUUGGUCCCAGAUUAGCAUGGAAC                                  |               |
| S - 69/70 der crRNA 8  | crRNA        | GAUUUAGACUACCCCAAAAACGAAGGGGACUAAAACAGTACCATTGGTCCCAGATATAGCATGG  | S - 69/70     |
| S - 417 anc crRNA      | crRNA        | GAUUUAGACUACCCCAAAAACGAAGGGGACUAAAACGCATTCTCTCCAGTTTGCCCTGGAGCGA  | S - 417       |
| S - 417 derN crRNA     | crRNA        | GAUUUAGACUACCCCAAAAACGAAGGGGACUAAAACUUAUUAUUAUUAUCAGCAACAUCUCCGCA | S - 417       |
| S - 417 derT crRNA     | crRNA        | GAUUUAGACUACCCCAAAAACGAAGGGGACUAAAACUUAUUAUCAGCAGUCGUACCAGUUUGCUA | S - 417       |
| S - 452 anc crRNA      | crRNA        | GAUUUAGACUACCCCAAAAACGAAGGGGACUAAAACGUUCCUAAACAUCUAUACAGGUAAUCA   | S - 452       |
| S - 452 der crRNA      | crRNA        | GAUUUAGACUACCCCAAAAACGAAGGGGACUAAAACCUAUAGCUGUAAUUAUAAUUACCACCAA  | S - 452       |
| S - 156-158 anc crRNA  | crRNA        | GAUUUAGACUACCCCAAAAACGAAGGGGACUAAAACUAAACUCUGAACUCACUUUCCAUCCAAAC | S - 156-158   |
| S - 156-158 der crRNA  | crRNA        | GAUUUAGACUACCCCAAAAACGAAGGGGACUAAAACUAAACUCCACUUUCCAUCCAACUUUUGU  | S - 156-158   |
| RNase P - crRNA        | Cas12a crRNA | UAAUUUCUACUAAGUGUAGAUAGGCCCCAGCUGGCCCGCUGC                        | RNase P       |
| ORF1a fwd primer       | RPA primer   | GAAATTAATACGACTCACTATAGGGCCAAGGTAACCTTTGGAATTTGGTGCCAC            | ORF1ab        |
| ORF1a rev primer       | RPA primer   | ACTATCATCATCTAACCAATCTTCTTCTTG                                    | ORF1ab        |
| S/S - 69/70 fwd primer | RPA primer   | GAAATTAATACGACTCACTATAGGGCAACTCAGGACTTGTCTTACCTTTCTTTCC           | S & S - 69/70 |
| S/S - 69/70 rev primer | RPA primer   | AAGCAAATAAACACCATCATTAAAT                                         | S & S - 69/70 |
| S - 417 fwd primer     | RPA primer   | GAAATTAATACGACTCACTATAGGGTCTATGCAGATTCATTTGTAATTAGAGGTG           | S - 417       |
| S - 417 rev primer     | RPA primer   | ATAACGCAGCCTGTAAATCATCTGGTAAT                                     | S - 417       |



|                                    |            |                                                                                                                                                                                                                                                                                                                                                                                                                                                                                                                                                                                   |             |
|------------------------------------|------------|-----------------------------------------------------------------------------------------------------------------------------------------------------------------------------------------------------------------------------------------------------------------------------------------------------------------------------------------------------------------------------------------------------------------------------------------------------------------------------------------------------------------------------------------------------------------------------------|-------------|
| S - 452 fwd primer                 | RPA primer | GAAATTAATACGACTCACTATAGGGAGCTTGG<br>AATTCTAACAATCTTGATTCT                                                                                                                                                                                                                                                                                                                                                                                                                                                                                                                         | S - 452     |
| S - 452 rev primer                 | RPA primer | AGTTGAAATATCTCTCTCAAAGGTTTGA                                                                                                                                                                                                                                                                                                                                                                                                                                                                                                                                                      | S - 452     |
| S - 156-158 fwd primer             | RPA primer | GAAATTAATACGACTCACTATAGGGTTTTTGGG<br>TGTTTATTACCACAAAAACA                                                                                                                                                                                                                                                                                                                                                                                                                                                                                                                         | S - 156-158 |
| S - 156-158 rev primer             | RPA primer | AGAAAAGGCTGAGAGACATATTCAAAG                                                                                                                                                                                                                                                                                                                                                                                                                                                                                                                                                       | S - 156-158 |
| RNase P Fwd primer                 | RPA primer | GAAATTAATACGACTCACTATAGGGGTGGAAT<br>ACACCCTTAGGAAAAGGCTTC                                                                                                                                                                                                                                                                                                                                                                                                                                                                                                                         | RNase P     |
| RNase P Rev primer                 | RPA primer | CAAGCCGTGAATGTAGATCTCAGAGCAC                                                                                                                                                                                                                                                                                                                                                                                                                                                                                                                                                      | RNase P     |
| ORF1a synthetic RNA target         | gBlock     | GAAATTAATACGACTCACTATAGGGGTGAGTTT<br>AAATTGGCTTCACATATGTATTGTTCTTTCTAC<br>CCTCCAGATGAGGATGAAGAAGAAGGTGATTG<br>TGAAGAAGAAGAGTTTGAGCCATCAACTCAAT<br>ATGAGTATGGTACTGAAGATGATTACCAAGGT<br>AAACCTTTGGAATTTGGTGCCACTTCTGCTGCT<br>CTTCAACCTGAAGAAGAGCAAGAAGAAGATTG<br>GTTAGATGATGATAGTCAACAACTGTTGGTCA<br>ACAAGACGGCAGTGAGGACAATCAGACAATA<br>CTATTCAAACAATTGTTGAGGTTCAACCTCAAT<br>TAGAGATGGAACCTTACACCAGTTGTTCCAGACT<br>ATTGAAGTGAATAGTTTTAGTGGTTATTTAAAA<br>CTTACTGACAATGTATACATTAATAAATGCAGAC<br>ATTGTGGAAGAAGCTAAAAAGGTAAAACCAAC<br>AGTGGTTGTTAATGCAGCCAATGTTTACCTTAA<br>ACATGGAGGAGG | ORF1ab      |
| S - 69/70 anc synthetic RNA target | gBlock     | GAAATTAATACGACTCACTATAGGTGACAAAGT<br>TTTCAGATCCTCAGTTTTACATTCAACTCAGGA<br>CTTGTTCTTACCTTTCTTTTCCAATGTTACTTGG<br>TTCCATGCTATACATGTCTCTGGGACCAATGG<br>TACTAAGAGGTTTGATAACCCTGTCCTACCATT<br>TAATGATGGTGTATTATTTGCTTCCACTGAGAA<br>GTCTAACATAATAAGAGGCTGGATTTTTGGTAC<br>TACTTTAGATTGGAAGACCCAGTCCCTACTTAT<br>TGTTAATAACGCTACTAATGTTGTTATTAAGT<br>CTGTGAATTTCAATTTTGAATGATCC                                                                                                                                                                                                            | S - 69/70   |
| S - 69/70 der synthetic RNA target | gBlock     | GAAATTAATACGACTCACTATAGGTGACAAAGT<br>TTTCAGATCCTCAGTTTTACATTCAACTCAGGA<br>CTTGTTCTTACCTTTCTTTTCCAATGTTACTTGG<br>TTCCATGCTATATCTGGGACCAATGGTACTAA<br>GAGGTTTGATAACCCTGTCCTACCATTTAATGA<br>TGGTGTATTTTCTTCCACTGAGAAGTCTAA                                                                                                                                                                                                                                                                                                                                                           | S - 69/70   |

|                                         |        |                                                                                                                                                                                                                                                                                                                                                                                                                                                                        |         |
|-----------------------------------------|--------|------------------------------------------------------------------------------------------------------------------------------------------------------------------------------------------------------------------------------------------------------------------------------------------------------------------------------------------------------------------------------------------------------------------------------------------------------------------------|---------|
|                                         |        | CATAATAAGAGGCTGGATTTTTGGTACTACTTT<br>AGATTTCGAAGACCCAGTCCCTACTTATTGTTAA<br>TAACGCTACTAATGTTGTTATTAAAGTCTGTGA<br>ATTTCAATTTTGAATGATCC                                                                                                                                                                                                                                                                                                                                   |         |
| S - 417 anc<br>synthetic RNA<br>target  | gBlock | GAAATTAATACGACTCACTATAGGTCTATGCAG<br>ATTCATTTGTAATTAGAGGTGATGAAGTCAGAC<br>AAATCGCTCCAGGGCAAACCTGGAAAGATTGCT<br>GATTATAATTATAAATTACCAGATGATTTTACAG<br>GCTGCGTTATAGCTTGGAAATTCTAACAATCTTG<br>ATTCTAAGGTTGGTGGTAATTATAATTACCTGT<br>ATAGATTGTTTAGGAAGTCTAATCTCAAACCTT<br>TTGAGAGAGATATTTCAACTGAAATCTATCAGG<br>CCGGTAGCACACCTTGAATGGTGTGGAAGGT<br>TTTAATTGTTACTTTCTTTTACAATCATATGTT<br>TCCAACCCACTAATGGTGTGTTACCAACCA<br>TACAGAGTAGTAGTACTTTCTTTTGAACTTCTA<br>CATGCACCAGCAA | S - 417 |
| S - 417 derN<br>synthetic RNA<br>target | gBlock | GAAATTAATACGACTCACTATAGGTCTATGCAG<br>ATTCATTTGTAATTAGAGGTGATGAAGTCAGAC<br>AAATCGCTCCAGGGCAAACCTGGAAATATTGCT<br>GATTATAATTATAAATTACCAGATGATTTTACAG<br>GCTGCGTTATAGCTTGGAAATTCTAACAATCTTG<br>ATTCTAAGGTTGGTGGTAATTATAATTACCTGT<br>ATAGATTGTTTAGGAAGTCTAATCTCAAACCTT<br>TTGAGAGAGATATTTCAACTGAAATCTATCAGG<br>CCGGTAGCACACCTTGAATGGTGTGGAAGGT<br>TTTAATTGTTACTTTCTTTTACAATCATATGTT<br>TCCAACCCACTAATGGTGTGTTACCAACCA<br>TACAGAGTAGTAGTACTTTCTTTTGAACTTCTA<br>CATGCACCAGCAA | S - 417 |
| S - 417 derT<br>synthetic RNA<br>target | gBlock | GAAATTAATACGACTCACTATAGGTCTATGCAG<br>ATTCATTTGTAATTAGAGGTGATGAAGTCAGAC<br>AAATCGCTCCAGGGCAAACCTGGAACGATTGCT<br>GATTATAATTATAAATTACCAGATGATTTTACAG<br>GCTGCGTTATAGCTTGGAAATTCTAACAATCTTG<br>ATTCTAAGGTTGGTGGTAATTATAATTACCTGT<br>ATAGATTGTTTAGGAAGTCTAATCTCAAACCTT<br>TTGAGAGAGATATTTCAACTGAAATCTATCAGG<br>CCGGTAGCACACCTTGAATGGTGTGGAAGGT<br>TTTAATTGTTACTTTCTTTTACAATCATATGTT<br>TCCAACCCACTAATGGTGTGTTACCAACCA<br>TACAGAGTAGTAGTACTTTCTTTTGAACTTCTA<br>CATGCACCAGCAA | S - 417 |
| S - 452 anc<br>synthetic RNA            | gBlock | GAAATTAATACGACTCACTATAGGGTCTATGCA<br>GATTCATTTGTAATTAGAGGTGATGAAGTCAGA                                                                                                                                                                                                                                                                                                                                                                                                 | S - 452 |

|                                      |        |                                                                                                                                                                                                                                                                                                                                                                                                                                                                                |             |
|--------------------------------------|--------|--------------------------------------------------------------------------------------------------------------------------------------------------------------------------------------------------------------------------------------------------------------------------------------------------------------------------------------------------------------------------------------------------------------------------------------------------------------------------------|-------------|
| target                               |        | CAAATCGCTCCAGGGCAAACCTGGAAAGATTGC<br>TGATTATAATTATAAATTACCAGATGATTTTACA<br>GGCTGCGTTATAGCTTGGAATTCTAACAATCTT<br>GATTCTAAGGTTGGTGGTAATTATAATTACCTG<br>TATAGATTGTTTAGGAAGTCTAATCTCAAACCT<br>TTTGAGAGAGATATTTCAACTGAAATCTATCAG<br>GCCGGTAGCACACCTTGTAAATGGTGTGGAAGG<br>TTTTAATTGTTACTTTTCTTTACAATCATATGGT<br>TTCCAACCCACTAATGGTGTGTTGGTTACCAACC<br>ATACAGAGTAGTAGTACTTTCTTTTGAACCTTCT<br>ACATGCACCAGCAA                                                                           |             |
| S - 452 der synthetic RNA target     | gBlock | GAAATTAATACGACTCACTATAGGGTCTATGCA<br>GATTCATTTGTAATTAGAGGTGATGAAGTCAGA<br>CAAATCGCTCCAGGGCAAACCTGGAAAGATTGC<br>TGATTATAATTATAAATTACCAGATGATTTTACA<br>GGCTGCGTTATAGCTTGGAATTCTAACAATCTT<br>GATTCTAAGGTTGGTGGTAATTATAATTACCGG<br>TATAGATTGTTTAGGAAGTCTAATCTCAAACCT<br>TTTGAGAGAGATATTTCAACTGAAATCTATCAG<br>GCCGGTAGCAAACCTTGTAAATGGTGTGGAAGG<br>TTTTAATTGTTACTTTTCTTTACAATCATATGGT<br>TTCCAACCCACTAATGGTGTGTTGGTTACCAACC<br>ATACAGAGTAGTAGTACTTTCTTTTGAACCTTCT<br>ACATGCACCAGCAA | S - 452     |
| S - 156-158 anc synthetic RNA target | gBlock | GAAATTAATACGACTCACTATAGGGCTACTTAT<br>TGTTAATAACGCTACTAATGTTGTTATTAAGT<br>CTGTGAATTTCAATTTTGTAAATGATCCATTTTGG<br>GGTGTATTACCACAAAAACAACAAAAGTTGG<br>ATGGAAAGTGAGTTCAGAGTTTATTCTAGTGC<br>GAATAATTGCACTTTTGAATATGTCTCTCAGCC<br>TTTTCTTATGGACCTTGAAGGAAAACAGGGTAA<br>TTTCAAAAATCTTAGGGAATTTGTGTTAAGAA<br>T                                                                                                                                                                         | S - 156-158 |
| S - 156-158 der synthetic RNA target | gBlock | GAAATTAATACGACTCACTATAGGGCTACTTAT<br>TGTTAATAACGCTACTAATGTTGTTATTAAGT<br>CTGTGAATTTCAATTTTGTAAATGATCCATTTTGG<br>GGTGTATTACCACAAAAACAACAAAAGTTGG<br>ATGGAAAGTGGAGTTTATTCTAGTGCGAATAAT<br>TGCACTTTTGAATATGTCTCTCAGCCTTTTCTT<br>ATGGACCTTGAAGGAAAACAGGGTAATTTCAA<br>AAATCTTAGGGAATTTGTGTTAAGAAT                                                                                                                                                                                   | S - 156-158 |
| RNase P synthetic DNA target         | gBlock | GAAATTAATACGACTCACTATAGGGGTGCTGT<br>GGAGGCTGAACTGGATCCAGTGAATACACC<br>CTTAGGAAAAGGCTTCCAGCCGCCTGCCCC<br>GGAGACCCAATGACATTTATGTCAACATGAAG                                                                                                                                                                                                                                                                                                                                       | RNase P     |

|                            |                              |                                                                                                                                                                                                                                                                                                                                                                                                               |   |
|----------------------------|------------------------------|---------------------------------------------------------------------------------------------------------------------------------------------------------------------------------------------------------------------------------------------------------------------------------------------------------------------------------------------------------------------------------------------------------------|---|
|                            |                              | ACGGACTTTAAGGCCAGCTGGCCCGCTGCC<br>AGAAGCTGCTGGACGGAGGGGCCCGGGTCA<br>GAACGCGTGCTCTGAGATCTACATTCACGGCT<br>TGGGCCTGGCCATCAACCGCGCCATCAACATC<br>GCGCTGCAGCTGCAGGCGGGCAGCTTCGGGT<br>CCTTGCAGGTGGCTGCCAATACCTCCACCGTG<br>GAGCTTGTTGATGAGCTGGAGCCAGAGACCG<br>ACACACGGGAGCCACTGACTCGGATCCGCAA<br>CAACTCAGCCATCCACATCCGAGTCTTCAGGG<br>TCACACCCAAGTAATTGAAAAGACACTCCTCC<br>ACTTATCCCCTCCGTGATATGGCTCTTCGCAT<br>GCTGAGTA |   |
| 5C-HEX-reporter            | Fluorescence<br>DNA reporter | 5' - /5HEX/CCCCC/3IABkFQ/-3'                                                                                                                                                                                                                                                                                                                                                                                  | - |
| 6U-FAM-reporter            | Fluorescence<br>RNA reporter | 5'- /56-FAM/rUrUrUrUrU/3IABkFQ/-3'                                                                                                                                                                                                                                                                                                                                                                            | - |
| FAMBio 5C LFA<br>reporter  | LFA DNA<br>reporter          | /56-FAM/CCCCCCCCCCCC/3Bio/                                                                                                                                                                                                                                                                                                                                                                                    | - |
| FAMBio 14U LFA<br>reporter | LFA RNA<br>reporter          | /5BiosG/rUrUrUrUrUrUrUrUrUrUrU/36-<br>FAM/                                                                                                                                                                                                                                                                                                                                                                    | - |

1105

1106

1107
